# Supplementary material for: Identifying and prioritising technical procedures for simulation-based curriculum in paediatrics: a Delphi-based general needs assessment
Source: PubMed Central journal article supplement — BMJ Paediatr Open. 2020 Aug 18;4(1):e000697. doi: 10.1136/bmjpo-2020-000697 (PMC7437683; doi:10.1136/bmjpo-2020-000697), 2020-08-18
Supplement: bmjpo-2020-000697.draft_revisions.pdf [file bmjpo-2020-000697.draft_revisions.pdf]

# BMJ Paediatrics Open

BMJ Paediatrics Open is committed to open peer review. As part of this commitment we make the peer review history of every article we publish publicly available.

When an article is published we post the peer reviewers' comments and the authors' responses online. We also post the versions of the paper that were used during peer review. These are the versions that the peer review comments apply to.

The versions of the paper that follow are the versions that were submitted during the peer review process. They are not the versions of record or the final published versions. They should not be cited or distributed as the published version of this manuscript.

BMJ Paediatrics Open is an open access journal and the full, final, typeset and author-corrected version of record of the manuscript is available on our site with no access controls, subscription charges or pay-per-view fees (<http://bmjpaedsopen.bmj.com>).

If you have any questions on BMJ Paediatrics Open's open peer review process please email [info.bmjpo@bmj.com](mailto:info.bmjpo@bmj.com)

# BMJ Paediatrics Open

## Identifying and prioritizing technical procedures for simulation-based curriculum in pediatrics: A Delphi-based general needs assessment

|                               |                                                                                                                                                                                                                                                                                                                                                                                                                                                                                                                                                                                                                                             |
|-------------------------------|---------------------------------------------------------------------------------------------------------------------------------------------------------------------------------------------------------------------------------------------------------------------------------------------------------------------------------------------------------------------------------------------------------------------------------------------------------------------------------------------------------------------------------------------------------------------------------------------------------------------------------------------|
| Journal:                      | <i>BMJ Paediatrics Open</i>                                                                                                                                                                                                                                                                                                                                                                                                                                                                                                                                                                                                                 |
| Manuscript ID                 | bmjpo-2020-000697                                                                                                                                                                                                                                                                                                                                                                                                                                                                                                                                                                                                                           |
| Article Type:                 | Original research                                                                                                                                                                                                                                                                                                                                                                                                                                                                                                                                                                                                                           |
| Date Submitted by the Author: | 07-Apr-2020                                                                                                                                                                                                                                                                                                                                                                                                                                                                                                                                                                                                                                 |
| Complete List of Authors:     | Thim, Signe; Aarhus University Hospital, Department of Paediatrics and Adolescent Medicine<br>Nayahangan, Leizl Joy; University of Copenhagen, Copenhagen Academy for Medical Education and Simulation (CAMES)<br>Paltved, Charlotte; Aarhus University, Department of Clinical Medicine<br>Jensen, Rune Dall; Aarhus University, Department of Clinical Medicine<br>Konge, Lars; University of Copenhagen, Copenhagen Academy for Medical Education and Simulation (CAMES)<br>Hertel, Niels Thomas; Odense University Hospital, Department of Clinical Development<br>Balslev, Thomas; Viborg Regional Hospital, Department of Paediatrics |
| Keywords:                     | Clinical Procedures, General Paediatrics, Medical Education                                                                                                                                                                                                                                                                                                                                                                                                                                                                                                                                                                                 |
|                               |                                                                                                                                                                                                                                                                                                                                                                                                                                                                                                                                                                                                                                             |

SCHOLARONE™  
Manuscripts

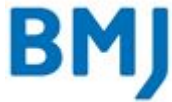

I, the Submitting Author has the right to grant and does grant on behalf of all authors of the Work (as defined in the below author licence), an exclusive licence and/or a non-exclusive licence for contributions from authors who are: i) UK Crown employees; ii) where BMJ has agreed a CC-BY licence shall apply, and/or iii) in accordance with the terms applicable for US Federal Government officers or employees acting as part of their official duties; on a worldwide, perpetual, irrevocable, royalty-free basis to BMJ Publishing Group Ltd ("BMJ") its licensees and where the relevant Journal is co-owned by BMJ to the co-owners of the Journal, to publish the Work in this journal and any other BMJ products and to exploit all rights, as set out in our [licence](#).

The Submitting Author accepts and understands that any supply made under these terms is made by BMJ to the Submitting Author unless you are acting as an employee on behalf of your employer or a postgraduate student of an affiliated institution which is paying any applicable article publishing charge ("APC") for Open Access articles. Where the Submitting Author wishes to make the Work available on an Open Access basis (and intends to pay the relevant APC), the terms of reuse of such Open Access shall be governed by a Creative Commons licence – details of these licences and which [Creative Commons](#) licence will apply to this Work are set out in our licence referred to above.

Other than as permitted in any relevant BMJ Author's Self Archiving Policies, I confirm this Work has not been accepted for publication elsewhere, is not being considered for publication elsewhere and does not duplicate material already published. I confirm all authors consent to publication of this Work and authorise the granting of this licence.

## Identifying and prioritizing technical procedures for simulation-based curriculum in pediatrics: A Delphi-based general needs assessment

Signe Thim, MD<sup>1</sup>, Leizl Joy Nayahangan RN, MHCM<sup>2</sup>, Charlotte Paltved MD<sup>3,4</sup>, Rune Dall Jensen MSc, PhD<sup>3,4</sup>, Lars Konge MD, PhD<sup>2,6</sup>, Niels Thomas Hertel MD, PhD<sup>6</sup>, Thomas Balslev MD, PhD<sup>3,7</sup>

<sup>1</sup>Department of Pediatrics and Adolescent Medicine, Aarhus University Hospital, Aarhus, Denmark

<sup>2</sup>Copenhagen Academy for Medical Education and Simulation (CAMES), University of Copenhagen and The Capital Region of Denmark, Copenhagen, Denmark

<sup>3</sup>Department of Clinical Medicine, Aarhus University, Aarhus, Denmark

<sup>4</sup>MidtSim - Corporate HR, Central Region Denmark, Aarhus, Denmark

<sup>5</sup>Faculty of Health and Medical Sciences, University of Copenhagen, Copenhagen, Denmark

<sup>6</sup>Centre for Postgraduate Medical Education, Department of Clinical Development, Odense University Hospital, Odense, Denmark

<sup>7</sup>Department of Pediatrics, Regional Hospital Viborg, Viborg, Denmark

Short title: Simulation-based curriculum in paediatrics

Funding: none

Conflicts of interests: none

Data statement: individual data cannot be shared

Keywords: Simulation-based training, Needs assessment, Curriculum development, Delphi technique, Pediatric education

Corresponding author and reprints:

Signe Thim

Department of Pediatrics and Adolescent Medicine

Aarhus University Hospital

Palle Juul-Jensens Boulevard 99

DK-8200 Aarhus N

Tel No: +45 7845 0000

Email: [signe.thim@rm.dk](mailto:signe.thim@rm.dk)

## ABSTRACT

### *Objectives*

The aim of this study was to use a scientific and transparent method to identify and prioritize technical procedures that should be integrated in a curriculum of simulation-based procedural training in pediatrics.

### *Study design*

National general needs assessment using a Delphi process was completed among 93 key opinion leaders in pediatrics in Denmark. Delphi round 1 identified technical procedures. Round 2 explored frequency of procedures, number of pediatricians performing the procedure, risk and/or discomfort for patients, and feasibility for simulation-based training. Round 3 included final elimination and reprioritization.

### *Results*

Response rates in the Delphi rounds were 73%, 71% and 72%. We identified 37 procedures in Delphi round 1, pre-prioritized in round 2, resulting in a final list of 19 procedures in round 3. Strong correlation between the prioritization from the second and third Delphi rounds was identified, Spearman's rho of 0.94 ( $p < 0.0001$ ). Top-five on the final list were acute neonatal airway management, acute non-neonatal airway management, non-neonatal peripheral intravenous and intraosseous access, neonatal vascular access, and advanced heart lung resuscitation.

### *Conclusion*

We identified and prioritized 19 technical procedures in pediatrics that are suitable for simulation and may be used as a guide for the development of simulation-based curriculum in pediatrics.

1  
2  
3  
4 **What is known about this topic:**  
5

6 Paediatrics is a broad specialty and it is both impractical and unethical to rely entirely on  
7 apprenticeship and clinical interactions to develop and master the technical procedures required.  
8

9  
10 The development of a simulation-based procedural training curriculum should follow a structured  
11 and systematic process.  
12  
13  
14  
15  
16  
17  
18

19 **What this study adds:**  
20

21 We performed a national general needs assessment and thereby identified and prioritised 19  
22 technical procedures that are suitable for simulation in paediatrics.  
23

24 The identified technical procedures are suitable for simulation and may be used as a guide for the  
25 development of simulation-based curriculum in pediatrics.  
26  
27  
28  
29  
30  
31  
32  
33  
34  
35  
36  
37  
38  
39  
40  
41  
42  
43  
44  
45  
46  
47  
48  
49  
50  
51  
52  
53  
54  
55  
56  
57  
58  
59  
60

## INTRODUCTION

Pediatricians are expected to possess the skills of managing acutely ill children. However, the volume of acute events in pediatric emergency departments often limits exposure to many procedures. In addition, pediatrics is a broad specialty considering the broad range of patient age, different subspecialties, and rare clinical conditions. Consequently, it is both impractical and unethical to rely entirely on apprenticeship and clinical interactions to develop and master the skills required to manage the treatment of acutely ill children.

Current pediatric training in Denmark includes work-based, supervised and apprenticeship learning blended with elements of simulation-based training. Simulation-based training is often driven by opinion of local educators, available simulators or coincidence.<sup>1</sup> This approach to training has several limitations such as limited training time due to work-hour restrictions, patient safety considerations, and training programs that are not necessarily aligned with the current needs.<sup>1-3</sup>

Simulation-based training enables training of clinical skills in a safe environment and represents a relevant training alternative for both invasive and less common procedures. Simulation-based training of procedures in pediatrics has been shown to improve the acquisition of skills,<sup>4-8</sup> promote patient safety and reduce errors.<sup>2,9</sup> Nonetheless simulation-based training is a complex and resource-demanding educational intervention.<sup>10</sup>

The development of a simulation-based procedural training curriculum should follow a structured and systematic process, for example as described by Kern et al.<sup>11</sup> in a six-step approach: 1. Problem identification and general needs assessment, 2. Targeted needs assessment, 3. Goals and objectives, 4. Educational strategies, 5. Implementation, and 6. Evaluation and feedback.

Unfortunately, the first step is often disregarded or is decided based on availability of simulators or local interests.<sup>12</sup> There is a need to bridge the gap between this unstructured way of developing a simulation-based procedural training curriculum and a needs-driven approach.

1  
2  
3  
4 The aim of this study was to perform a national general needs assessment in pediatrics to identify  
5  
6 and prioritize technical procedures that should be integrated in a simulation-based training  
7  
8 curriculum in pediatrics.  
9  
10  
11  
12  
13  
14  
15  
16  
17  
18  
19  
20  
21  
22  
23  
24  
25  
26  
27  
28  
29  
30  
31  
32  
33  
34  
35  
36  
37  
38  
39  
40  
41  
42  
43  
44  
45  
46  
47  
48  
49  
50  
51  
52  
53  
54  
55  
56  
57  
58  
59  
60

Confidential: For Review Only



## MATERIALS AND METHODS

### *Study design*

The study consisted of a three-round Delphi process to establish consensus and prioritize technical procedures for simulation-based training (Figure 1). The Delphi technique is widely accepted as a valid tool to obtain expert opinion, obtain consensus, and support decision making.<sup>13–15</sup> During each Delphi round, the preceding results are presented to the participants in an anonymous manner and re-evaluated by the participants until consensus is reached. This method has been used to develop curricula for simulation-based training in various specialties.<sup>16–22</sup> The study was conducted from December 2017 to September 2018.

### *Participants*

The participants were key opinion leaders in pediatric education and were identified based on their roles in the specialist training and education of pediatric trainees across Denmark. These were post-graduate clinical associate professors, heads of clinical education and training of all pediatric departments, heads of pediatric departments, conveners of mandatory courses for pediatric specialization, professors, members of educational committees, board members of The Danish Society for Pediatrics and board members of The Danish Young Pediatricians Association. Participants were invited individually and introduced to the study via e-mails. Participation was voluntary.

### *Patient and public involvement*

No patients participated and there was no public involvement in the study.

### *Data collection*

The Delphi process was conducted through online survey questionnaires using survey software (Survey Monkey, San Mateo, CA, USA) and were distributed by e-mail. Reminder emails were sent up to three times. A multidisciplinary research steering group was formed to facilitate data

1  
2  
3  
4 collection and analysis. It consisted of five members: two pediatric consultants and postgraduate  
5  
6 clinical associate professors (TB and TH), head of research at a simulation center (CP), an  
7  
8 assistant professor (RD), and a pediatric resident, who is also a member of the educational  
9  
10 committee in pediatrics and a board member of The Danish Society for Pediatrics (ST).  
11  
12

### 13 14 15 *Delphi round 1: brainstorming phase*

16  
17 The Delphi process started with a brainstorming phase, where the participants were asked to  
18  
19 suggest all technical procedures which a pediatrician who has just completed specialist training in  
20  
21 pediatrics should be able to perform. All suggested procedures were reviewed by the research  
22  
23 steering group and non-technical skills were removed (e.g. team training and communication  
24  
25 skills). The remaining technical procedures were consolidated into categories where similar  
26  
27 procedures were grouped. This consolidated list of technical procedures was used in Delphi round  
28  
29 2.  
30  
31

### 32 33 34 *Delphi round 2: survey*

35  
36 We used a previously developed needs assessment formula (NAF) from the Copenhagen  
37  
38 Academy for Medical Education and Simulation (CAMES) to prioritize the included procedures  
39  
40 from the first Delphi round (1, 20). This formula explores the need for simulation-based training of a  
41  
42 given technical procedure by investigating four different factors.  
43  
44

- 45  
46 1) Frequency; the number of procedures performed annually  
47  
48 2) Operators; number of physicians that should be able to perform the procedure  
49  
50 3) Impact; discomfort/risk if the procedure is performed by an inexperienced physician  
51  
52 4) Feasibility; suitability for learning the procedure in simulation-based environment.  
53  
54

55  
56  
57 Each technical procedure/procedure group from Delphi round 1 was evaluated according to these  
58  
59 four factors. Frequency, operators, and impact were stated as multiple-choice items on a five-point  
60

1  
2  
3  
4 rating scale ranging from 1-5. The fourth element of the formula (feasibility for simulation-based  
5 training) was challenging for the participants to estimate and was therefore evaluated by the  
6 steering group. Feasibility was calculated as the mean score of three equally weighted factors:  
7 suitability for simulation-based training, equipment availability and associated costs. The steering  
8 group explored feasibility of each technical procedure from Delphi 1 using a five-point Likert scale  
9 ranging from 1 to 5.

10  
11  
12  
13  
14  
15  
16  
17  
18  
19 The CAMES NAF score for the individual technical procedure was the average of the mean scores  
20 (1-5) of the four factors (frequency, physicians, impact, and feasibility) giving each factor equal  
21 weighting of 25%. The resulting total CAMES NAF score from 1 to 5 points determined the  
22 procedures' ranking on the preliminary prioritized list used in the third Delphi round.  
23  
24  
25  
26  
27  
28

### 29 *Delphi round 3: elimination and prioritization*

30  
31  
32 The preliminary prioritized list of technical procedures from Delphi round 2 was sent to the  
33 participants for re-evaluation. The participants were asked to eliminate technical procedures that  
34 they found unsuitable for learning in a simulation-based environment, simple technical procedures  
35 that should have been learned in pregraduate medical education or very advanced technical  
36 procedures that are learned in the later part of specialist training. The participants also had the  
37 opportunity to reprioritize the remaining procedures.  
38  
39  
40  
41  
42  
43  
44  
45

### 46 *Data analysis and statistics*

47  
48 In Delphi round 1 we eliminated non-technical skills and grouped similar procedures into  
49 categories. We grouped them together when the procedures could be combined and trained in one  
50 training program. In Delphi round 2 the mean score for each factor was calculated and the CAMES  
51 NAF score was used to produce a preliminary ranked list of technical procedures used in Delphi  
52 round 3. In Delphi round 3, we calculated the number of occurrences for each response using  
53 frequency analysis and applied a degree of agreement of  $\geq 70\%$  to establish consensus. The  
54  
55  
56  
57  
58  
59  
60

1  
2  
3  
4 procedures that had < 70% support from the participants were eliminated from the final list.  
5

6 Spearman's rho was calculated to explore the alignment between prioritization according to the  
7  
8 CAMES NAF (Delphi round 2) and the final decisions of the participants (Delphi round 3). All  
9  
10 analyses were performed using STATA/IC 15.1 (StataCorp, Texas, USA).  
11  
12  
13  
14  
15  
16  
17  
18  
19  
20  
21  
22  
23  
24  
25  
26  
27  
28  
29  
30  
31  
32  
33  
34  
35  
36  
37  
38  
39  
40  
41  
42  
43  
44  
45  
46  
47  
48  
49  
50  
51  
52  
53  
54  
55  
56  
57  
58  
59  
60

Confidential: For Review Only

## RESULTS

### *Results of Delphi Round 1*

A total of 93 participants were identified and invited to the study. Round 1 of the Delphi process had a response rate of 73% (68/93) and 68 clinical procedures were suggested in the brainstorming process. These were reduced to 37 procedures/procedure groups.

### *Results of Delphi Round 2*

The response rate in Delphi round 2 was 71% (66/93). A pre-prioritized list of technical procedures was generated using the CAMES NAF score. In this Delphi round, we identified acute airway management of neonates as highest priority and biopsy of skin, tendon, and muscles as least priority (Table 1).

### *Results of Delphi Round 3*

The response rate in Delphi round 3 was 72% (67/93). Eighteen technical procedures were eliminated. The final list included 19 technical procedures (Table 2).

A Spearman's rho of 0.94 ( $p < 0.0001$ ) showed a strong correlation between the prioritization order of the technical procedures from Delphi round 2 and the final list in Delphi round 3 (Figure 2).

## DISCUSSION

We performed a general needs assessment to identify and prioritize technical procedures that should be integrated in a curriculum of simulation-based procedural training in pediatrics. A prioritized list of 19 technical procedure was produced by a three-round Delphi process among key opinion leaders in education in pediatric. All pediatric departments involved in the specialist training program were represented, and the response rates were consistently high in all three rounds, indicating strong support from the participants and increasing the credibility of our results.

Airway management of both neonatal and non-neonatal topped the final list with highest priority. Airway management comprises of several hands-on procedures and some of the airway management procedures are performed infrequently, making it relevant for simulation-based procedure training. Improvement in airway management skills through simulation-based training among pediatric residents has been shown in several studies.<sup>5,23,24</sup> There is a growing body of evidence finding that a simulation-based airway management curriculum is superior to no intervention and to non-simulation intervention for education outcomes.<sup>25</sup>

Non-neonatal peripheral intravenous and intraosseous access and neonatal vascular access ranked third and fourth respectively in the final prioritized list. Neonatal intraosseous access ranked lower in the list, probably because it is rarely performed due to umbilical vein and artery availability. Nevertheless, it has been shown that intraosseous access can be performed more quickly in neonates than umbilical vein catheterization, especially for pediatricians who do not routinely place umbilical vein catheters.<sup>26</sup> A low-cost model with real umbilical cord has been described to provide a more realistic training model than currently available commercial simulators.<sup>27</sup>

Advanced heart lung resuscitation was the fifth procedure on the final prioritized list. Advanced heart lung resuscitation comprises of several hands-on procedures in form of cardiopulmonary

1  
2  
3  
4 resuscitation with rescue breathing and chest compressions as well as airway management and  
5  
6 defibrillation.<sup>28</sup>  
7  
8  
9

10 The top five procedures in the final prioritized list are all part of the Airway, Breathing, Circulation,  
11 Disability, Exposure (ABCDE) approach of pediatric advanced life support and resuscitation.<sup>29</sup>  
12

13 These procedures represent core competencies in pediatric specialist training. The skills are  
14  
15 required in high-stakes time sensitive acute settings, and thereby emphasizes the need for  
16  
17 simulation-based training of these procedures.  
18  
19  
20  
21  
22

23 The strong correlation between the results from Delphi round 2 and 3 indicates minimal changes in  
24 the ranking order of the procedures (Figure 2). However, a few interesting changes were observed,  
25  
26 e.g., the change in rank for lumbar puncture and intubation which were both in top five on the pre-  
27  
28 prioritized list from round 2. Lumbar puncture rated second in Delphi round 2 and changed to a  
29  
30 sixth placement in Delphi round 3, most likely because lumbar puncture is a less acute procedure  
31  
32 compared to airway management, vascular access and advanced heart lung resuscitation which  
33  
34 ended up in top-five. Intubation ranked fifth after the second Delphi round, but was eliminated in  
35  
36 the final round. This is probably because the participants were asked to eliminate the very  
37  
38 advanced technical procedures that are not expected for a newly specialized trainee to perform.  
39  
40  
41  
42  
43

44 Ultrasonography only appeared as no. 17 and 18 in the final list in contrast to several ultrasound  
45 related procedures which were found in Delphi round 2. We assume that they were regarded as  
46  
47 specialized procedures that only some pediatricians should master. In a recent study on general  
48  
49 needs assessment in radiology, the top 5 procedures included ultrasonography.<sup>21</sup> In addition,  
50  
51 ultrasonography is listed among the top-10 procedures in cardiology,<sup>16</sup> urology,<sup>19</sup> pulmonology,<sup>20</sup>  
52  
53 and anesthesia.<sup>22</sup> The relatively low ranking of ultrasonography in our study compared to that seen  
54  
55 in other specialties may indicate that experience with ultrasonography among the pediatric  
56  
57  
58  
59  
60

1  
2  
3  
4 participants is relatively low at this point. We may expect a stronger need for training of  
5  
6 ultrasonography in pediatrics in years to come as in international proposals.<sup>30</sup>  
7  
8  
9

10 The combination of CAMES NAF score and a three-round Delphi not only identified but also  
11 prioritized the technical procedures for simulation-based training. CAMES NAF score prioritizes  
12 procedures if they are frequent, performed by many physicians, potentially harmful to patients if  
13 performed by a non-competent physician, and very feasible to train simulation-based.<sup>1</sup> The  
14 participants were free to remove and reprioritize the procedures from the second round if they did  
15 not agree with the prioritization resulting from the CAMES NAF score. However, we found a strong  
16 correlation between the ranking order after the second and third Delphi rounds, indicating that the  
17 participants widely agreed with the results based on CAMES NAF score in the second Delphi  
18 round. The same strong correlation has been found in previous needs assessment studies in other  
19 specialties.<sup>18,20</sup>  
20  
21  
22  
23  
24  
25  
26  
27  
28  
29  
30  
31  
32  
33

34 It is a strength of this study that all departments involved in the pediatric specialist training  
35 programs in Denmark were represented, indicating strong support from the departments and  
36 increasing the generalizability and credibility of the study results. Furthermore, this study used a  
37 well-known method for curriculum development<sup>12</sup> and followed international methodological criteria  
38 for reporting of Delphi studies.<sup>14</sup> Additionally, a strength of the Delphi process is that surveys are  
39 sent electronically which reduces the risk of participants influencing each other and allows  
40 participants across different geographical locations to participate.  
41  
42  
43  
44  
45  
46  
47  
48  
49  
50

51 We are aware of the limitations in this study. The disease panorama is different from country to  
52 country, influencing the needs and some of the procedures on the list may not be transferable to  
53 other countries. However, we believe that the generalizability of this study is quite high, particularly  
54 because the top five procedures, on our final prioritized list represents core procedures in acute  
55 situations and therefore may be transferable. In perspective, it would be interesting to perform the  
56  
57  
58  
59  
60



1  
2  
3  
4 need assessment in other countries and compare results. Another limitation is the three-round  
5  
6 survey design, which takes time for the participants to respond to, and therefore may have caused  
7  
8 some potential participants to decline participation. The response rate in this study varied in the  
9  
10 three rounds, with the lowest response rate in Delphi-round 2. Overall, we had high response rates  
11  
12 as seen in similar studies.<sup>16–22</sup>  
13  
14  
15  
16

17 It is important to note that only technical skills for simulation-based procedural training were asked  
18  
19 for and identified in this study. Factors that impact training such as communication, leadership, and  
20  
21 other non-technical skills should be incorporated when developing more team-based simulation-  
22  
23 based programs. Finally, it is important to acknowledge that we only explored which procedures to  
24  
25 train in a simulation-based environment. Exploration of other important factors in curriculum  
26  
27 development such as volume of training and how to implement training is outside the scope of the  
28  
29 current study.  
30  
31  
32  
33

34 In conclusion, this needs assessment identified and prioritized a list of clinically relevant technical  
35  
36 procedures suitable for simulation-based training in pediatrics. The procedures represent core  
37  
38 competencies in pediatric specialist training that should be practiced in a simulation-based  
39  
40 environment before applied on patients. Educators may use this list to develop, plan, and  
41  
42 implement simulation-based training curricula for pediatric trainees.  
43  
44  
45  
46  
47  
48  
49  
50  
51  
52  
53  
54  
55  
56  
57  
58  
59  
60

## REFERENCES

1. Nayahangan LJ, Stefanidis D, Kern DE, Konge L. How to identify and prioritize procedures suitable for simulation-based training: Experiences from general needs assessments using a modified Delphi method and a needs assessment formula. *Med Teach* 2018;**40**:676–683.
2. Clerihew L, Rowney D, Ker J. Simulation in paediatric training. *Arch Dis Child Educ Pract Ed* 2016;**101**:8–14.
3. Mills DM, Williams DC, Dobson JV. Simulation training as a mechanism for procedural and resuscitation education for pediatric residents: a systematic review. *Hosp Pediatr* 2013;**3**:167–176.
4. Gaies MG, Morris SA, Hafler JP, Graham DA, Capraro AJ, Zhou J, Landrigan CP, Sandora TJ. Reforming procedural skills training for pediatric residents: a randomized, interventional trial. *Pediatrics* 2009;**124**:610–619.
5. Sudikoff SN, Overly FL, Shapiro MJ. High-fidelity medical simulation as a technique to improve pediatric residents' emergency airway management and teamwork: a pilot study. *Pediatr Emerg Care* 2009;**25**:651–656.
6. Bank I, Cheng A, McLeod P, Bhanji F. Determining content for a simulation-based curriculum in pediatric emergency medicine: results from a national Delphi process. *CJEM* 2015;**17**:662–669.
7. Cheng A, Lang TR, Starr SR, Pusic M, Cook DA. Technology-enhanced simulation and pediatric education: a meta-analysis. *Pediatrics* 2014;**133**:e1313-1323.
8. Halamek LP, Kaegi DM, Gaba DM, Sowb YA, Smith BC, Smith BE, Howard SK. Time for a new paradigm in pediatric medical education: teaching neonatal resuscitation in a simulated delivery room environment. *Pediatrics* 2000;**106**:E45.
9. McGaghie WC, Issenberg SB, Cohen ER, Barsuk JH, Wayne DB. Does simulation-based medical education with deliberate practice yield better results than traditional clinical education? A meta-analytic comparative review of the evidence. *Acad Med J Assoc Am Med Coll* 2011;**86**:706–711.
10. Cook DA, Hatala R, Brydges R, Zendejas B, Szostek JH, Wang AT, Erwin PJ, Hamstra SJ. Technology-enhanced simulation for health professions education: a systematic review and meta-analysis. *JAMA* 2011;**306**:978–988.
11. Kern DE. Curriculum development for medical education : a six-step approach. Baltimore, MD: Johns Hopkins University Press; 1998.
12. Khamis NN, Satava RM, Alnassar SA, Kern DE. A stepwise model for simulation-based curriculum development for clinical skills, a modification of the six-step approach. *Surg Endosc* 2016;**30**:279–287.
13. Hsu C, Sandford B. The Delphi Technique: making sense of consensus. *Pract Assess Res Eval* 2007:1–8.

14. Diamond IR, Grant RC, Feldman BM, Pencharz PB, Ling SC, Moore AM, Wales PW. Defining consensus: a systematic review recommends methodologic criteria for reporting of Delphi studies. *J Clin Epidemiol* 2014;**67**:401–409.
15. Dalkey NC. The Delphi Method: An Experimental Study of Group Opinion. 1969. [https://www.rand.org/pubs/research\\_memoranda/RM5888.html](https://www.rand.org/pubs/research_memoranda/RM5888.html) (13 January 2020)
16. Gustavsen PH, Nielsen DG, Paltved C, Konge L, Nayahangan LJ. A national needs assessment study to determine procedures for simulation-based training in cardiology in Denmark. *Scand Cardiovasc J SCJ* 2019;1–23.
17. Thomsen ASS, Cour M Ia, Paltved C, Lindorff-Larsen KG, Nielsen BU, Konge L, Nayahangan LJ. Consensus on procedures to include in a simulation-based curriculum in ophthalmology: a national Delphi study. *Acta Ophthalmol (Copenh)* 2018;**96**:519–527.
18. Nayahangan LJ, Konge L, Schroeder TV, Paltved C, Lindorff-Larsen KG, Nielsen BU, Eiberg JP. A National Needs Assessment to Identify Technical Procedures in Vascular Surgery for Simulation Based Training. *Eur J Vasc Endovasc Surg Off J Eur Soc Vasc Surg* 2017;**53**:591–599.
19. Nayahangan LJ, Bølling Hansen R, Gilboe Lindorff-Larsen K, Paltved C, Nielsen BU, Konge L. Identifying content for simulation-based curricula in urology: a national needs assessment. *Scand J Urol* 2017;1–7.
20. Nayahangan LJ, Clementsen PF, Paltved C, Lindorff-Larsen KG, Nielsen BU, Konge L. Identifying Technical Procedures in Pulmonary Medicine That Should Be Integrated in a Simulation-Based Curriculum: A National General Needs Assessment. *Respir Int Rev Thorac Dis* 2016;**91**:517–522.
21. Nayahangan LJ, Nielsen KR, Albrecht-Beste E, Bachmann Nielsen M, Paltved C, Lindorff-Larsen KG, Nielsen BU, Konge L. Determining procedures for simulation-based training in radiology: a nationwide needs assessment. *Eur Radiol* 2018;**28**:2319–2327.
22. Bessmann EL, Østergaard HT, Nielsen BU, Russell L, Paltved C, Østergaard D, Konge L, Nayahangan LJ. Consensus on technical procedures for simulation-based training in anaesthesiology: A Delphi-based general needs assessment. *Acta Anaesthesiol Scand* 2019;
23. Abu-Sultaneh S, Whitfill T, Rowan CM, Friedman ML, Pearson KJ, Berrens ZJ, Lutfi R, Auerbach MA, Abulebda K. Improving Simulated Pediatric Airway Management in Community Emergency Departments Using a Collaborative Program With a Pediatric Academic Medical Center. *Respir Care* 2019;**64**:1073–1081.
24. Miller KA, Nagler J. Advances in Emergent Airway Management in Pediatrics. *Emerg Med Clin North Am* 2019;**37**:473–491.
25. Kennedy CC, Cannon EK, Warner DO, Cook DA. Advanced airway management simulation training in medical education: a systematic review and meta-analysis. *Crit Care Med* 2014;**42**:169–178.
26. Rajani AK, Chitkara R, Oehlert J, Halamek LP. Comparison of umbilical venous and intraosseous access during simulated neonatal resuscitation. *Pediatrics* 2011;**128**:e954-958.

- 1  
2  
3  
4  
5  
6  
7  
8  
9  
10  
11  
12  
13  
14  
15  
16  
17  
18  
19  
20  
21  
22  
23  
24  
25  
26  
27  
28  
29  
30  
31  
32  
33  
34  
35  
36  
37  
38  
39  
40  
41  
42  
43  
44  
45  
46  
47  
48  
49  
50  
51  
52  
53  
54  
55  
56  
57  
58  
59  
60
27. Sawyer T, Gray M, Hendrickson M, Jacobson E, Umoren R. A Real Human Umbilical Cord Simulator Model for Emergency Umbilical Venous Catheter Placement Training. *Cureus* 2018;**10**:e3544.
  28. Maconochie IK, Bingham R, Eich C, López-Herce J, Rodríguez-Núñez A, Rajka T, Van de Voorde P, Zideman DA, Biarent D, Paediatric life support section Collaborators. European Resuscitation Council Guidelines for Resuscitation 2015: Section 6. Paediatric life support. *Resuscitation* 2015;**95**:223–248.
  29. Soar J, Maconochie I, Wyckoff MH, Olasveengen TM, Singletary EM, Greif R, Aickin R, Bhanji F, Donnino MW, Mancini ME, Wyllie JP, Zideman D, Andersen LW, Atkins DL, Aziz K, Bendall J, Berg KM, Berry DC, Bigham BL, Bingham R, Couto TB, Böttiger BW, Borra V, Bray JE, Breckwoldt J, Brooks SC, Buick J, Callaway CW, Carlson JN, Cassan P, et al. 2019 International Consensus on Cardiopulmonary Resuscitation and Emergency Cardiovascular Care Science With Treatment Recommendations: Summary From the Basic Life Support; Advanced Life Support; Pediatric Life Support; Neonatal Life Support; Education, Implementation, and Teams; and First Aid Task Forces. *Circulation* 2019;CIR0000000000000734.
  30. Mayordomo-Colunga J, González-Cortés R, Bravo MC, Martínez-Mas R, Vázquez-Martínez JL, Renter-Valdovinos L, Conlon TW, Nishisaki A, Cabañas F, Bilbao-Sustacha JÁ, Oulego-Erroz I. [Point-of-care ultrasound: Is it time to include it in the paediatric specialist training program?]. *An Pediatr Barc Spain* 2003 2019;**91**:206.e1-206.e13.

1  
2  
3  
4  
5  
6  
7  
8  
9  
10  
11  
12  
13  
14  
15  
16  
17  
18  
19  
20  
21  
22  
23  
24  
25  
26  
27  
28  
29  
30  
31  
32  
33  
34  
35  
36  
37  
38  
39  
40  
41  
42  
43  
44  
45  
46  
47  
48  
49  
50  
51  
52  
53  
54  
55  
56  
57  
58  
59  
60

FIGURE LEGENDS

Figure 1:

The Delphi process

Figure 2.

Correlation between the preliminary prioritization after Delphi round 2 and the final prioritization after Delphi round 3.

Confidential: For Review Only

Table 1  
Technical procedures identified in Delphi round 1.  
Ranked according to CAMES Needs Assessment Formula in Delphi round 2

|    | Procedure group                                              | No. of procedures performed (Frequency) | No. of doctors | Impact | Feasibility | TOTAL CAMES NAF score |
|----|--------------------------------------------------------------|-----------------------------------------|----------------|--------|-------------|-----------------------|
| 1  | Airway management, acute, neonatal                           | 4.36                                    | 4.63           | 4.52   | 4.33        | 4.46                  |
| 2  | Lumbar puncture                                              | 3.81                                    | 4.79           | 4.51   | 4           | 4.28                  |
| 3  | Airway management, acute, non-neonatal                       | 3.4                                     | 4.82           | 4.19   | 4.33        | 4.19                  |
| 4  | Peripheral intravenous and intraosseous access, non-neonatal | 4.79                                    | 4.91           | 4.34   | 2.67        | 4.18                  |
| 5  | Intubation                                                   | 2.57                                    | 4.07           | 4.78   | 4.33        | 3.94                  |
| 6  | Peripheral intravenous access, neonatal                      | 4.27                                    | 4.14           | 4.54   | 2.67        | 3.91                  |
| 7  | Advanced heart lung resuscitation                            | 2.16                                    | 4.88           | 4.4    | 4           | 3.86                  |
| 8  | Nasogastric tube insertion                                   | 3.66                                    | 4.31           | 4.09   | 3.33        | 3.85                  |
| 9  | Neurologic examination of the newborn                        | 4.73                                    | 4.87           | 3.79   | 2           | 3.84                  |
| 10 | Intraosseous access, neonatal                                | 2.97                                    | 4.71           | 4.82   | 2.67        | 3.79                  |
| 11 | Injections; intradermal, subcutaneous, intramuscular         | 3.39                                    | 4.19           | 4.87   | 2.67        | 3.78                  |
| 12 | Barlow and Ortolani test; congenital hip dislocation         | 4.31                                    | 4.85           | 3.84   | 1.67        | 3.70                  |
| 13 | Pneumothorax management                                      | 2.16                                    | 3.61           | 4.6    | 4.33        | 3.68                  |
| 14 | Suprapubic bladder aspiration                                | 3.49                                    | 4.49           | 4.13   | 2.33        | 3.61                  |
| 15 | Ear examination including otoscopy and tympanometry          | 4.57                                    | 4.85           | 3.91   | 2           | 3.56                  |
| 16 | Sample collection, microbiology                              | 3.61                                    | 3.96           | 3.97   | 2.67        | 3.55                  |
| 17 | Collecting vital signs                                       | 4.54                                    | 4.74           | 3.46   | 1.33        | 3.52                  |
| 18 | Neurologic examination of the child, not newborn             | 4.61                                    | 4.69           | 3.76   | 1           | 3.51                  |
| 19 | Rectal examination                                           | 4.1                                     | 4.75           | 3.08   | 2           | 3.48                  |
| 20 | Foreign bodies of the airway; airway management              | 1.76                                    | 4.52           | 4.1    | 3.33        | 3.43                  |
| 21 | Bladder catheterisation                                      | 2.72                                    | 4.1            | 4.18   | 2.33        | 3.33                  |
| 22 | Amplitude integrated electroencephalography (aEEG)           | 2.79                                    | 2.91           | 3.79   | 3.33        | 3.21                  |
| 23 | Asthma related technical procedures                          | 4.24                                    | 3.69           | 3.79   | 1           | 3.18                  |
| 24 | Peripheral inserted central catheter, neonatal               | 2.42                                    | 2.45           | 4.67   | 2.67        | 3.05                  |
| 25 | Bedside Fast Assessment Diagnostic Echocardiography (FADE)   | 3.16                                    | 2.22           | 4.13   | 2.33        | 2.96                  |
| 26 | Bedside bladder ultrasound                                   | 3.81                                    | 3.48           | 3.33   | 1           | 2.91                  |
| 27 | Ventilator settings                                          | 2.43                                    | 2.12           | 4.6    | 2.33        | 2.87                  |
| 28 | Diabetes related technical procedures                        | 3.55                                    | 2.51           | 4      | 1.33        | 2.85                  |
| 29 | Bone marrow biopsy and aspiration                            | 2.1                                     | 1.72           | 4.34   | 2.67        | 2.71                  |
| 30 | Bedside neonatal cranial ultrasound                          | 3.01                                    | 2.27           | 3.84   | 1.67        | 2.70                  |
| 31 | Ophthalmoscopy                                               | 1.82                                    | 2.01           | 4      | 2.67        | 2.63                  |
| 32 | Arthrocentesis                                               | 2.21                                    | 1.49           | 4.39   | 2.33        | 2.61                  |

|    |                                                                  |      |      |      |      |      |
|----|------------------------------------------------------------------|------|------|------|------|------|
| 33 | Handling percutaneous endoscopic gastrostomy (PEG) feeding tubes | 2.66 | 2.63 | 3.84 | 1    | 2.53 |
| 34 | Bedside lung ultrasound                                          | 1.75 | 2.3  | 3.64 | 2.33 | 2.51 |
| 35 | Transabdominal ultrasound measurement of rectal diameter         | 3.01 | 2.31 | 3.45 | 1    | 2.44 |
| 36 | Bedside abdominal ultrasound                                     | 1.39 | 1.63 | 3.75 | 2.33 | 2.28 |
| 37 | Biopsy of skin, tendon and muscles                               | 1.75 | 2.75 | 3.21 | 1.33 | 2.26 |

Table 2  
Final prioritised list of technical procedures in paediatrics that should be integrated in simulation-based curricula.

|    | Procedure group                                              | Description                                                                                                                                                                                                                  |
|----|--------------------------------------------------------------|------------------------------------------------------------------------------------------------------------------------------------------------------------------------------------------------------------------------------|
| 1  | Airway management, acute, neonatal                           | Securing airway including optimal positioning, face mask ventilation, use of T-piece resuscitator (e.g. Neopuff), oropharyngeal airway, nasopharyngeal airway, suction and optimal positioning. Use of mask-CPAP and DUOPAP. |
| 2  | Airway management, acute, non-neonatal                       | Securing airway including optimal positioning, face mask ventilation, use of oropharyngeal airway and suction.                                                                                                               |
| 3  | Peripheral intravenous and intraosseous access, non-neonatal | Peripheral iv-access including use of different kinds of vein finders. Use of scalp veins for access in infants. Intraosseous access including site selection in different ages.                                             |
| 4  | Vascular access, neonatal                                    | Peripheral intravenous access, umbilical vein catheterisation, umbilical artery catheterisation and peripherally inserted central venous catheters (PICC lines)                                                              |
| 5  | Advanced heart lung resuscitation                            | Chest compressions and face mask ventilation for adolescents, children, and neonates. Use of defibrillator - manual and automated external defibrillator (AED)                                                               |
| 6  | Lumbar puncture                                              | For adolescents, children, and neonates                                                                                                                                                                                      |
| 7  | Intraosseous access, neonatal                                | Intraosseous access in neonates including correct intraosseous needle positioning and the avoidance of dislodgement.                                                                                                         |
| 8  | Pneumothorax management                                      | Needle decompression of pneumothorax.                                                                                                                                                                                        |
| 9  | Foreign bodies of the airway; airway management              | Airway management, removing visible foreign body, use of back blows and abdominal thrusts.                                                                                                                                   |
| 10 | Neurologic examination of the child less than 1 year of age. | Neurologic examination including "the 180-degree examination".                                                                                                                                                               |
| 11 | Suprapubic bladder aspiration                                | Suprapubic aspiration to take a urine sample, with or without ultrasound guidance.                                                                                                                                           |
| 12 | Injections; intradermal, subcutaneous, intramuscular         | Different kinds of injection including the use of an epinephrine auto injector.                                                                                                                                              |
| 13 | Neurologic examination of the child above 1 year of age      | Examination of sensory function, motor function, reflexes, cranial nerves, cognition and development. Hyperventilation test for Absence seizures.                                                                            |
| 14 | Bladder catheterisation                                      | Urinary Catheterisation, both gender and all paediatric ages.                                                                                                                                                                |
| 15 | Asthma related technical procedures                          | Use of inhalation devices and pulmonary function tests.                                                                                                                                                                      |
| 16 | Amplitude integrated electroencephalography (aEEG)           | Initiating amplitude integrated electroencephalography.                                                                                                                                                                      |
| 17 | Bedside bladder ultrasound                                   | Measure the volume of urine.                                                                                                                                                                                                 |
| 18 | Transabdominal ultrasound measurement of rectal diameter     | As a diagnostic tool in childhood constipation.                                                                                                                                                                              |
| 19 | Diabetes related technical procedures                        | Handling different insulin pumps and use of insuflon (angled injection port).                                                                                                                                                |



1  
2  
3  
4  
5  
6  
7  
8  
9  
10  
11  
12  
13  
14  
15  
16  
17  
18  
19  
20  
21  
22  
23  
24  
25  
26  
27  
28  
29  
30  
31  
32  
33  
34  
35  
36  
37  
38  
39  
40  
41  
42  
43  
44  
45  
46  
47  
48  
49  
50  
51  
52  
53  
54  
55  
56  
57  
58  
59  
60

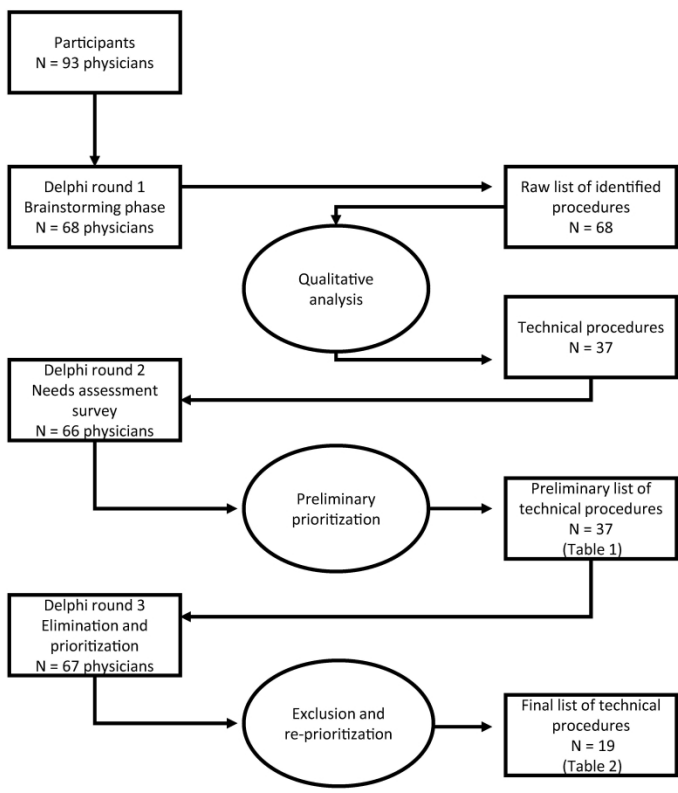

190x275mm (600 x 600 DPI)

1  
2  
3  
4  
5  
6  
7  
8  
9  
10  
11  
12  
13  
14  
15  
16  
17  
18  
19  
20  
21  
22  
23  
24  
25  
26  
27  
28  
29  
30  
31  
32  
33  
34  
35  
36  
37  
38  
39  
40  
41  
42  
43  
44  
45  
46  
47  
48  
49  
50  
51  
52  
53  
54  
55  
56  
57  
58  
59  
60

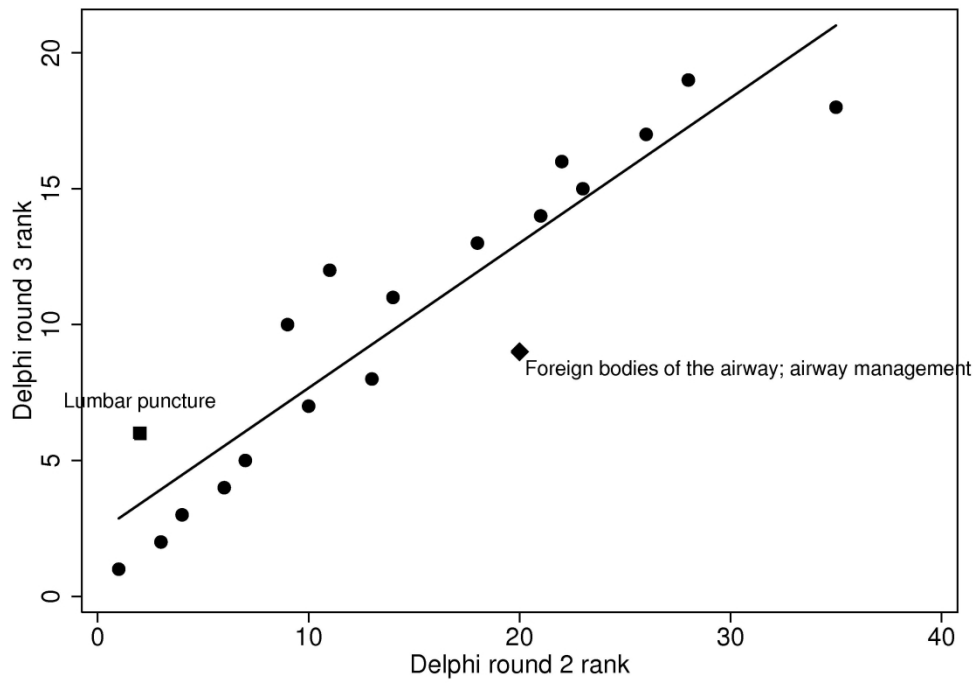

139x101mm (600 x 600 DPI)

# BMJ Paediatrics Open

## Identifying and prioritizing technical procedures for simulation-based curriculum in pediatrics: A Delphi-based general needs assessment

|                               |                                                                                                                                                                                                                                                                                                                                                                                                                                                                                                                                                                                                                                             |
|-------------------------------|---------------------------------------------------------------------------------------------------------------------------------------------------------------------------------------------------------------------------------------------------------------------------------------------------------------------------------------------------------------------------------------------------------------------------------------------------------------------------------------------------------------------------------------------------------------------------------------------------------------------------------------------|
| Journal:                      | <i>BMJ Paediatrics Open</i>                                                                                                                                                                                                                                                                                                                                                                                                                                                                                                                                                                                                                 |
| Manuscript ID                 | bmjpo-2020-000697.R1                                                                                                                                                                                                                                                                                                                                                                                                                                                                                                                                                                                                                        |
| Article Type:                 | Original research                                                                                                                                                                                                                                                                                                                                                                                                                                                                                                                                                                                                                           |
| Date Submitted by the Author: | 15-Jun-2020                                                                                                                                                                                                                                                                                                                                                                                                                                                                                                                                                                                                                                 |
| Complete List of Authors:     | Thim, Signe; Aarhus University Hospital, Department of Paediatrics and Adolescent Medicine<br>Nayahangan, Leizl Joy; University of Copenhagen, Copenhagen Academy for Medical Education and Simulation (CAMES)<br>Paltved, Charlotte; Aarhus University, Department of Clinical Medicine<br>Jensen, Rune Dall; Aarhus University, Department of Clinical Medicine<br>Konge, Lars; University of Copenhagen, Copenhagen Academy for Medical Education and Simulation (CAMES)<br>Hertel, Niels Thomas; Odense University Hospital, Department of Clinical Development<br>Balslev, Thomas; Viborg Regional Hospital, Department of Paediatrics |
| Keywords:                     | Clinical Procedures, General Paediatrics, Medical Education                                                                                                                                                                                                                                                                                                                                                                                                                                                                                                                                                                                 |
|                               |                                                                                                                                                                                                                                                                                                                                                                                                                                                                                                                                                                                                                                             |

SCHOLARONE™  
Manuscripts

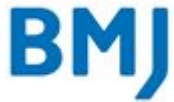

I, the Submitting Author has the right to grant and does grant on behalf of all authors of the Work (as defined in the below author licence), an exclusive licence and/or a non-exclusive licence for contributions from authors who are: i) UK Crown employees; ii) where BMJ has agreed a CC-BY licence shall apply, and/or iii) in accordance with the terms applicable for US Federal Government officers or employees acting as part of their official duties; on a worldwide, perpetual, irrevocable, royalty-free basis to BMJ Publishing Group Ltd ("BMJ") its licensees and where the relevant Journal is co-owned by BMJ to the co-owners of the Journal, to publish the Work in this journal and any other BMJ products and to exploit all rights, as set out in our [licence](#).

The Submitting Author accepts and understands that any supply made under these terms is made by BMJ to the Submitting Author unless you are acting as an employee on behalf of your employer or a postgraduate student of an affiliated institution which is paying any applicable article publishing charge ("APC") for Open Access articles. Where the Submitting Author wishes to make the Work available on an Open Access basis (and intends to pay the relevant APC), the terms of reuse of such Open Access shall be governed by a Creative Commons licence – details of these licences and which [Creative Commons](#) licence will apply to this Work are set out in our licence referred to above.

Other than as permitted in any relevant BMJ Author's Self Archiving Policies, I confirm this Work has not been accepted for publication elsewhere, is not being considered for publication elsewhere and does not duplicate material already published. I confirm all authors consent to publication of this Work and authorise the granting of this licence.

## Identifying and prioritizing technical procedures for simulation-based curriculum in paediatrics: A Delphi-based general needs assessment

Signe Thim, MD<sup>1</sup>, Leizl Joy Nayahangan RN, MHCM<sup>2</sup>, Charlotte Paltved MD<sup>3,4</sup>, Rune Dall Jensen MSc, PhD<sup>3,4</sup>, Lars Konge MD, PhD<sup>2,6</sup>, Niels Thomas Hertel MD, PhD<sup>6</sup>, Thomas Balslev MD, PhD<sup>3,7</sup>

<sup>1</sup>Department of Paediatrics and Adolescent Medicine, Aarhus University Hospital, Aarhus, Denmark

<sup>2</sup>Copenhagen Academy for Medical Education and Simulation (CAMES), University of Copenhagen and The Capital Region of Denmark, Copenhagen, Denmark

<sup>3</sup>Department of Clinical Medicine, Aarhus University, Aarhus, Denmark

<sup>4</sup>MidtSim - Corporate HR, Central Region Denmark, Aarhus, Denmark

<sup>5</sup>Faculty of Health and Medical Sciences, University of Copenhagen, Copenhagen, Denmark

<sup>6</sup>Centre for Postgraduate Medical Education, Department of Clinical Development, Odense University Hospital, Odense, Denmark

<sup>7</sup>Department of Paediatrics, Regional Hospital Viborg, Viborg, Denmark

Short title: Simulation-based curriculum in paediatrics

Funding: none

Conflicts of interests: none

Data statement: individual data cannot be shared

Keywords: Simulation-based training, Needs assessment, Curriculum development, Delphi technique, Paediatric education

Corresponding author and reprints:

Signe Thim

Department of Paediatrics and Adolescent Medicine

Aarhus University Hospital

Palle Juul-Jensens Boulevard 99

DK-8200 Aarhus N

Tel No: +45 7845 0000

Email: [signe.thim@rm.dk](mailto:signe.thim@rm.dk)

## ABSTRACT

### *Objectives*

To identify and prioritize technical procedures that should be integrated in a curriculum of simulation-based procedural training in paediatrics using the Delphi method.

### *Study design*

National general needs assessment using a Delphi process was completed among 93 key opinion leaders in paediatrics in Denmark. Delphi round 1 identified technical procedures. Round 2 explored frequency of procedures, number of paediatricians performing the procedure, risk and/or discomfort for patients, and feasibility for simulation-based training. Round 3 included final elimination and reprioritization.

### *Results*

Response rates in the Delphi rounds were 73%, 71% and 72%. We identified 37 procedures in Delphi round 1, pre-prioritized in round 2, resulting in a final list of 19 procedures in round 3. Strong correlation between the prioritization from the second and third Delphi rounds was identified, Spearman's rho of 0.94 ( $p < 0.0001$ ). Top-five on the final list were acute neonatal airway management, acute non-neonatal airway management, non-neonatal peripheral intravenous and intraosseous access, neonatal vascular access, and advanced heart lung resuscitation.

### *Conclusion*

We identified and prioritized 19 technical procedures in paediatrics that are suitable for simulation and may be used as a guide for the development of simulation-based curriculum in paediatrics.

1  
2  
3  
4 KEY MESSAGES:  
5  
6  
7

8 *What is known about the subject:*  
9

10 Paediatricians are expected to possess the skills of managing acutely ill children in a broad  
11 specialty in high-stakes time sensitive acute situations.  
12

13  
14 Rarity of acute events limits exposure and it is impractical and unethical to rely entirely on  
15 apprenticeship and clinical interactions to develop the skills required.  
16

17  
18 Simulation-based training is often driven by opinion of local educators, available simulators or  
19 coincidence. Development of a curriculum should follow a structured and systematic process.  
20  
21  
22

23  
24  
25 *What this study adds:*  
26

27 A needs assessment using a Delphi process to identify and prioritize technical procedures that are  
28 suitable for simulation in paediatrics.  
29

30  
31 The procedures represent core competencies in paediatric specialist training that should be  
32 practiced in a simulation-based environment before applied on patients.  
33

34  
35 Educators may use this list to develop, plan, and implement simulation-based training curricula for  
36 paediatric trainees.  
37  
38  
39  
40  
41  
42  
43  
44  
45  
46  
47  
48  
49  
50  
51  
52  
53  
54  
55  
56  
57  
58  
59  
60

## INTRODUCTION

Paediatricians are expected to possess the skills of managing acutely ill children. However, the volume of acute events in paediatric emergency departments often limits exposure to many procedures. In addition, paediatrics is a broad specialty considering the broad range of patient age, different subspecialties, and rare clinical conditions. Consequently, it is both impractical and unethical to rely entirely on apprenticeship and clinical interactions to develop and master the skills required to manage the treatment of acutely ill children.

Current paediatric training in Denmark includes work-based, supervised and apprenticeship learning blended with elements of simulation-based training. Simulation-based training is often driven by opinion of local educators, available simulators or coincidence,<sup>1</sup> which has several limitations such as limited training time due to work-hour restrictions, patient safety considerations, and training programs that are not necessarily aligned with the current needs.<sup>1-3</sup> Simulation-based training of procedures in paediatrics has been shown to improve the acquisition of skills,<sup>4-8</sup> promote patient safety and reduce errors.<sup>2,9</sup> Nonetheless simulation-based training is a complex and resource-demanding educational intervention.<sup>10</sup>

The development of a simulation-based procedural training curriculum should follow a structured and systematic process, for example as described by Kern et al.<sup>11</sup> in a six-step approach: 1.

Problem identification and general needs assessment, 2. Targeted needs assessment, 3. Goals and objectives, 4. Educational strategies, 5. Implementation, and 6. Evaluation and feedback.

Unfortunately, the first step is often disregarded or is decided based on availability of simulators or local interests.<sup>12</sup> There is a need to bridge the gap between this unstructured way of developing a simulation-based procedural training curriculum and a needs-driven approach. The results may aid the development of simulation-based training programs as part of residency curricula in paediatrics.



1  
2  
3  
4 The objective of this study was to perform a national general needs assessment in paediatrics  
5  
6 using a Delphi process to identify and prioritize technical procedures that should be integrated in a  
7  
8 simulation-based training curriculum in paediatrics.  
9  
10  
11  
12  
13  
14  
15  
16  
17  
18  
19  
20  
21  
22  
23  
24  
25  
26  
27  
28  
29  
30  
31  
32  
33  
34  
35  
36  
37  
38  
39  
40  
41  
42  
43  
44  
45  
46  
47  
48  
49  
50  
51  
52  
53  
54  
55  
56  
57  
58  
59  
60

Confidential: For Review Only

## MATERIALS AND METHODS

### *Study design*

The study consisted of a three-round Delphi process to establish consensus and prioritize technical procedures for simulation-based training (Figure 1). The Delphi technique is widely accepted as a valid tool to obtain expert opinion, obtain consensus, and support decision making.<sup>13–15</sup> During each Delphi round, the preceding results are presented to the participants in an anonymous manner to re-evaluated and explore. The Delphi technique allows involvement of participants from across different locations. This means that they do not have to meet in person, that anonymity is maintained, which is key to the Delphi process and avoids strong characters dominating the process. In this modified Delphi, we had planned on the number of rounds a priori but were opened to another round if consensus was not achieved. In most cases, consensus is reached after three rounds<sup>13</sup> and therefore we decided on three rounds. The results from previous rounds were fed to the next round for review and exploration. This method has been used to develop curricula for simulation-based training in various specialties.<sup>16–22</sup> The study was conducted from December 2017 to September 2018.

### *Participants*

The participants were key opinion leaders in paediatric education and were identified based on their roles in the specialist training and education of paediatric trainees across Denmark. The study was nation-wide and all paediatricians who are involved in residency training and education were invited. These include post-graduate clinical associate professors, heads of clinical education and training of all paediatric departments, heads of paediatric departments, conveners of mandatory courses for paediatric specialization, professors, members of educational committees, board members of The Danish Society for Paediatrics and board members of The Danish Young Paediatricians Association. Participants were invited individually and introduced to the study via e-mails. The second and third round were administered to all the participants regardless if they responded or not in first and second round. Participation was voluntary.

### *Patient and public involvement*

No patients participated and there was no public involvement in the study.

### *Data collection*

The Delphi process was conducted through online survey questionnaires using survey software (Survey Monkey, San Mateo, CA, USA) and were distributed by e-mail. Reminder emails were sent up to three times. A multidisciplinary research steering group was formed to facilitate data collection and analysis. It consisted of five members, all investigators and co-authors of the study: two paediatric consultants and postgraduate clinical associate professors (TB and TH), head of research at a simulation centre (CP), an assistant professor (RD), and a paediatric resident, who is also a member of the educational committee in paediatrics and a board member of The Danish Society for Paediatrics (ST). Anonymity of responses was maintained. The primary investigator (ST) was responsible for data organization, ensuring that the answers were blinded from the rest of the steering group. All suggestions from the participants were considered and were only eliminated when consensus was not reached

### *Delphi round 1: brainstorming phase*

The Delphi process started with a brainstorming phase, where the participants were asked to suggest all technical procedures which a paediatrician who has just completed specialist training in paediatrics should be able to perform. All suggested procedures were reviewed by the research steering group and non-technical skills were removed (e.g. team training and communication skills). The remaining technical procedures were consolidated into categories where similar procedures were grouped. This consolidated list of technical procedures was used in Delphi round 2.

### *Delphi round 2: survey*

1  
2  
3  
4 We used a previously developed needs assessment formula (NAF) from the Copenhagen  
5 Academy for Medical Education and Simulation (CAMES) to prioritize the included procedures  
6 from the first Delphi round (1, 20). This formula explores the need for simulation-based training of a  
7 given technical procedure by investigating four different factors.  
8  
9  
10  
11

- 12
- 13
- 14
- 15 1) Frequency; the number of procedures performed annually
- 16
- 17 2) Operators; number of physicians that should be able to perform the procedure
- 18
- 19 3) Impact; discomfort/risk if the procedure is performed by an inexperienced physician
- 20
- 21 4) Feasibility; suitability for learning the procedure in simulation-based environment.  
22
- 23
- 24

25 Each technical procedure/procedure group from Delphi round 1 was evaluated according to these  
26 four factors. Frequency, operators, and impact were stated as multiple-choice items on a five-point  
27 rating scale ranging from 1-5. The fourth element of the formula (feasibility for simulation-based  
28 training) was challenging for the participants to estimate and was therefore evaluated by the  
29 steering group. Feasibility was calculated as the mean score of three equally weighted factors:  
30 suitability for simulation-based training, equipment availability and associated costs. The steering  
31 group explored feasibility of each technical procedure from Delphi 1 using a five-point Likert scale  
32 ranging from 1 to 5.  
33  
34  
35  
36  
37  
38  
39  
40  
41  
42  
43

44 The CAMES NAF score for the individual technical procedure was the average of the mean scores  
45 (1-5) of the four factors (frequency, physicians, impact, and feasibility) giving each factor equal  
46 weighting of 25%. The resulting total CAMES NAF score from 1 to 5 points determined the  
47 procedures' ranking on the preliminary prioritized list used in the third Delphi round.  
48  
49  
50  
51  
52  
53

54  
55 *Delphi round 3: elimination and prioritization*  
56  
57  
58  
59  
60

1  
2  
3  
4 The preliminary prioritized list of technical procedures from Delphi round 2 was sent to the  
5  
6 participants for re-evaluation. The participants were asked to eliminate technical procedures that  
7  
8 they found unsuitable for learning in a simulation-based environment, simple technical procedures  
9  
10 that should have been learned in pregraduate medical education or very advanced technical  
11  
12 procedures that are learned in the later part of specialist training. The participants also had the  
13  
14 opportunity to reprioritize the remaining procedures.  
15  
16  
17  
18

### 19 *Data analysis and statistics*

20  
21 In Delphi round 1 we eliminated non-technical skills and grouped similar procedures into  
22  
23 categories. We grouped them together when the procedures could be combined and trained in one  
24  
25 training program. In Delphi round 2 the mean score for each factor was calculated and the CAMES  
26  
27 NAF score was used to produce a preliminary ranked list of technical procedures used in Delphi  
28  
29 round 3. In Delphi round 3, we calculated the number of occurrences for each response using  
30  
31 frequency analysis and applied a degree of agreement of  $\geq 70\%$  to establish consensus. The  
32  
33 procedures that had  $< 70\%$  support from the participants were eliminated from the final list.  
34  
35 Spearman's rho was calculated to explore the alignment between prioritization according to the  
36  
37 CAMES NAF (Delphi round 2) and the final decisions of the participants (Delphi round 3). All  
38  
39 analyses were performed using STATA/IC 15.1 (StataCorp, Texas, USA).  
40  
41  
42  
43  
44  
45  
46  
47  
48  
49  
50  
51  
52  
53  
54  
55  
56  
57  
58  
59  
60

## RESULTS

### *Results of Delphi Round 1*

A total of 93 participants were identified and invited to the study. Round 1 of the Delphi process had a response rate of 73% (68/93) and 68 clinical procedures were suggested in the brainstorming process. These were reduced to 37 procedures/procedure groups.

### *Results of Delphi Round 2*

The response rate in Delphi round 2 was 71% (66/93). A pre-prioritized list of technical procedures was generated using the CAMES NAF score. In this Delphi round, we identified acute airway management of neonates as highest priority and biopsy of skin, tendon, and muscles as least priority (Table 1).

### *Results of Delphi Round 3*

The response rate in Delphi round 3 was 72% (67/93). Eighteen technical procedures were eliminated. The final list included 19 technical procedures (Table 2).

A Spearman's rho of 0.94 ( $p < 0.0001$ ) showed a strong correlation between the prioritization order of the technical procedures from Delphi round 2 and the final list in Delphi round 3 (Figure 2).

## DISCUSSION

We performed a general needs assessment to identify and prioritize technical procedures that should be integrated in a curriculum of simulation-based procedural training in paediatrics. A prioritized list of 19 technical procedure was produced by a three-round Delphi process among key opinion leaders in education in paediatric. All paediatric departments involved in the specialist training program were represented, and the response rates were consistently high in all three rounds, indicating strong support from the participants and increasing the credibility of our results.

Airway management of both neonatal and non-neonatal topped the final list with highest priority. Airway management comprises of several hands-on procedures and some of the airway management procedures are performed infrequently, making it relevant for simulation-based procedure training. Improvement in airway management skills through simulation-based training among paediatric residents has been shown in several studies.<sup>5,23,24</sup> There is a growing body of evidence finding that a simulation-based airway management curriculum is superior to no intervention and to non-simulation intervention for education outcomes.<sup>25</sup>

Non-neonatal peripheral intravenous and intraosseous access and neonatal vascular access ranked third and fourth respectively in the final prioritized list. Neonatal intraosseous access ranked lower in the list, probably because it is rarely performed due to umbilical vein and artery availability. Nevertheless, it has been shown that intraosseous access can be performed more quickly in neonates than umbilical vein catheterization, especially for paediatricians who do not routinely place umbilical vein catheters.<sup>26</sup> A low-cost model with real umbilical cord has been described to provide a more realistic training model than currently available commercial simulators.<sup>27</sup>

Advanced heart lung resuscitation was the fifth procedure on the final prioritized list. Advanced heart lung resuscitation comprises of several hands-on procedures in form of cardiopulmonary

1  
2  
3  
4 resuscitation with rescue breathing and chest compressions as well as airway management and  
5  
6 defibrillation.<sup>28</sup>  
7  
8  
9

10 The top five procedures in the final prioritized list are all part of the Airway, Breathing, Circulation,  
11 Disability, Exposure (ABCDE) approach of paediatric advanced life support and resuscitation.<sup>29</sup>  
12

13 These procedures represent core competencies in paediatric specialist training. The skills are  
14  
15 required in high-stakes time sensitive acute settings, and thereby emphasizes the need for  
16  
17 simulation-based training of these procedures.  
18  
19  
20  
21  
22

23 The strong correlation between the results from Delphi round 2 and 3 indicates minimal changes in  
24 the ranking order of the procedures (Figure 2). However, a few interesting changes were observed,  
25 e.g., the change in rank for lumbar puncture and intubation which were both in top five on the pre-  
26 prioritized list from round 2. Lumbar puncture rated second in Delphi round 2 and changed to a  
27 sixth placement in Delphi round 3, most likely because lumbar puncture is a less acute procedure  
28 compared to airway management, vascular access and advanced heart lung resuscitation which  
29 ended up in top-five. Intubation ranked fifth after the second Delphi round, but was eliminated in  
30 the final round. This is probably because the participants were asked to eliminate the very  
31 advanced technical procedures that are not expected for a newly specialized trainee to perform.  
32  
33  
34  
35  
36  
37  
38  
39  
40  
41  
42  
43

44 Ultrasonography only appeared as no. 17 and 18 in the final list in contrast to several ultrasound  
45 related procedures which were found in Delphi round 2. We assume that they were regarded as  
46 specialized procedures that only some paediatricians should master. In a recent study on general  
47 needs assessment in radiology, the top 5 procedures included ultrasonography.<sup>21</sup> In addition,  
48 ultrasonography is listed among the top-10 procedures in cardiology,<sup>16</sup> urology,<sup>19</sup> pulmonology,<sup>20</sup>  
49 and anesthesia.<sup>22</sup> The relatively low ranking of ultrasonography in our study compared to that seen  
50  
51 in other specialties may indicate that experience with ultrasonography among the paediatric  
52  
53  
54  
55  
56  
57  
58  
59  
60



1  
2  
3  
4 participants is relatively low at this point. We may expect a stronger need for training of  
5  
6 ultrasonography in paediatrics in years to come as in international proposals.<sup>30</sup>  
7  
8  
9

10 The combination of CAMES NAF score and a three-round Delphi not only identified but also  
11 prioritized the technical procedures for simulation-based training. CAMES NAF score prioritizes  
12 procedures if they are frequent, performed by many physicians, potentially harmful to patients if  
13 performed by a non-competent physician, and very feasible to train simulation-based.<sup>1</sup> The  
14 participants were free to remove and reprioritize the procedures from the second round if they did  
15 not agree with the prioritization resulting from the CAMES NAF score. However, we found a strong  
16 correlation between the ranking order after the second and third Delphi rounds, indicating that the  
17 participants widely agreed with the results based on CAMES NAF score in the second Delphi  
18 round. The same strong correlation has been found in previous needs assessment studies in other  
19 specialties.<sup>18,20</sup>  
20  
21  
22  
23  
24  
25  
26  
27  
28  
29  
30  
31  
32  
33

34 It is a strength of this study that all departments involved in the paediatric specialist training  
35 programs in Denmark were represented, indicating strong support from the departments and  
36 increasing the generalizability and credibility of the study results. Furthermore, this study used a  
37 well-known method for curriculum development<sup>12</sup> and followed international methodological criteria  
38 for reporting of Delphi studies.<sup>14</sup> Additionally, a strength of the Delphi process is that surveys are  
39 sent electronically which reduces the risk of participants influencing each other and allows  
40 participants across different geographical locations to participate.  
41  
42  
43  
44  
45  
46  
47  
48  
49  
50

51 We are aware of the limitations in this study. The disease panorama is different from country to  
52 country, influencing the needs and some of the procedures on the list may not be transferable to  
53 other countries. However, we believe that the generalizability of this study is quite high, particularly  
54 because the top five procedures, on our final prioritized list represents core procedures in acute  
55 situations and therefore may be transferable. In perspective, it would be interesting to perform the  
56  
57  
58  
59  
60

1  
2  
3  
4 need assessment in other countries and compare results. Another limitation is the three-round  
5  
6 survey design, which takes time for the participants to respond to, and therefore may have caused  
7  
8 some potential participants to decline participation. The response rate in this study varied in the  
9  
10 three rounds, with the lowest response rate in Delphi-round 2. Overall, we had high response rates  
11  
12 as seen in similar studies.<sup>16–22</sup> In relation to skills in ultrasound, we have noted above that a  
13  
14 change in experience and practice might change ranking of ultrasound skills over time. This may  
15  
16 also relate to other skills, both those included and not included in the current report, including  
17  
18 views on what is feasible in paediatric skill training may thus change over time.  
19  
20  
21  
22

23 It is important to note that only technical skills for simulation-based procedural training were asked  
24  
25 for and identified in this study. Factors that impact training such as communication, leadership, and  
26  
27 other non-technical skills should be incorporated when developing more team-based simulation-  
28  
29 based programs. Finally, it is important to acknowledge that we only explored which procedures to  
30  
31 train in a simulation-based environment. Exploration of other important factors in curriculum  
32  
33 development such as volume of training and how to implement training is outside the scope of the  
34  
35 current study.  
36  
37  
38  
39

40 Implementing simulation-based training is associated with economic costs related to doctors  
41  
42 spending working hours away from patients and sometimes to training facilities and equipment.  
43  
44 The costs involved in the development and implementation of simulation-based training remains  
45  
46 incomplete<sup>31</sup>. However, the gains related to better training in human and economic terms should  
47  
48 also be considered. The cost-effectiveness of simulation-based training in paediatrics according to  
49  
50 the procedures identified in this study remains to be studied.  
51  
52  
53  
54

55 In conclusion, this needs assessment identified and prioritized a list of clinically relevant technical  
56  
57 procedures suitable for simulation-based training in paediatrics. The procedures represent core  
58  
59 competencies in paediatric specialist training that should be practiced in a simulation-based  
60

1  
2  
3  
4 environment before applied on patients. Educators may use this list to develop, plan, and  
5  
6 implement simulation-based training curricula for paediatric trainees.  
7  
8  
9  
10  
11  
12  
13  
14  
15  
16  
17  
18  
19  
20  
21  
22  
23  
24  
25  
26  
27  
28  
29  
30  
31  
32  
33  
34  
35  
36  
37  
38  
39  
40  
41  
42  
43  
44  
45  
46  
47  
48  
49  
50  
51  
52  
53  
54  
55  
56  
57  
58  
59  
60

Confidential: For Review Only

## REFERENCES

1. Nayahangan LJ, Stefanidis D, Kern DE, Konge L. How to identify and prioritize procedures suitable for simulation-based training: Experiences from general needs assessments using a modified Delphi method and a needs assessment formula. *Med Teach* 2018;**40**:676–683.
2. Clerihew L, Rowney D, Ker J. Simulation in paediatric training. *Arch Dis Child Educ Pract Ed* 2016;**101**:8–14.
3. Mills DM, Williams DC, Dobson JV. Simulation training as a mechanism for procedural and resuscitation education for pediatric residents: a systematic review. *Hosp Pediatr* 2013;**3**:167–176.
4. Gaies MG, Morris SA, Hafler JP, Graham DA, Capraro AJ, Zhou J, Landrigan CP, Sandora TJ. Reforming procedural skills training for pediatric residents: a randomized, interventional trial. *Pediatrics* 2009;**124**:610–619.
5. Sudikoff SN, Overly FL, Shapiro MJ. High-fidelity medical simulation as a technique to improve pediatric residents' emergency airway management and teamwork: a pilot study. *Pediatr Emerg Care* 2009;**25**:651–656.
6. Bank I, Cheng A, McLeod P, Bhanji F. Determining content for a simulation-based curriculum in pediatric emergency medicine: results from a national Delphi process. *CJEM* 2015;**17**:662–669.
7. Cheng A, Lang TR, Starr SR, Pusic M, Cook DA. Technology-enhanced simulation and pediatric education: a meta-analysis. *Pediatrics* 2014;**133**:e1313-1323.
8. Halamek LP, Kaegi DM, Gaba DM, Sowb YA, Smith BC, Smith BE, Howard SK. Time for a new paradigm in pediatric medical education: teaching neonatal resuscitation in a simulated delivery room environment. *Pediatrics* 2000;**106**:E45.
9. McGaghie WC, Issenberg SB, Cohen ER, Barsuk JH, Wayne DB. Does simulation-based medical education with deliberate practice yield better results than traditional clinical education? A meta-analytic comparative review of the evidence. *Acad Med J Assoc Am Med Coll* 2011;**86**:706–711.
10. Cook DA, Hatala R, Brydges R, Zendejas B, Szostek JH, Wang AT, Erwin PJ, Hamstra SJ. Technology-enhanced simulation for health professions education: a systematic review and meta-analysis. *JAMA* 2011;**306**:978–988.
11. Kern DE. Curriculum development for medical education : a six-step approach. Baltimore, MD: Johns Hopkins University Press; 1998.
12. Khamis NN, Satava RM, Alnassar SA, Kern DE. A stepwise model for simulation-based curriculum development for clinical skills, a modification of the six-step approach. *Surg Endosc* 2016;**30**:279–287.
13. Hsu C, Sandford B. The Delphi Technique: making sense of consensus. *Pract Assess Res Eval* 2007:1–8.

14. Diamond IR, Grant RC, Feldman BM, Pencharz PB, Ling SC, Moore AM, Wales PW. Defining consensus: a systematic review recommends methodologic criteria for reporting of Delphi studies. *J Clin Epidemiol* 2014;**67**:401–409.
15. Dalkey NC. The Delphi Method: An Experimental Study of Group Opinion. 1969. [https://www.rand.org/pubs/research\\_memoranda/RM5888.html](https://www.rand.org/pubs/research_memoranda/RM5888.html) (13 January 2020)
16. Gustavsen PH, Nielsen DG, Paltved C, Konge L, Nayahangan LJ. A national needs assessment study to determine procedures for simulation-based training in cardiology in Denmark. *Scand Cardiovasc J SCJ* 2019;1–23.
17. Thomsen ASS, Cour M Ia, Paltved C, Lindorff-Larsen KG, Nielsen BU, Konge L, Nayahangan LJ. Consensus on procedures to include in a simulation-based curriculum in ophthalmology: a national Delphi study. *Acta Ophthalmol (Copenh)* 2018;**96**:519–527.
18. Nayahangan LJ, Konge L, Schroeder TV, Paltved C, Lindorff-Larsen KG, Nielsen BU, Eiberg JP. A National Needs Assessment to Identify Technical Procedures in Vascular Surgery for Simulation Based Training. *Eur J Vasc Endovasc Surg Off J Eur Soc Vasc Surg* 2017;**53**:591–599.
19. Nayahangan LJ, Bølling Hansen R, Gilboe Lindorff-Larsen K, Paltved C, Nielsen BU, Konge L. Identifying content for simulation-based curricula in urology: a national needs assessment. *Scand J Urol* 2017;1–7.
20. Nayahangan LJ, Clementsen PF, Paltved C, Lindorff-Larsen KG, Nielsen BU, Konge L. Identifying Technical Procedures in Pulmonary Medicine That Should Be Integrated in a Simulation-Based Curriculum: A National General Needs Assessment. *Respir Int Rev Thorac Dis* 2016;**91**:517–522.
21. Nayahangan LJ, Nielsen KR, Albrecht-Beste E, Bachmann Nielsen M, Paltved C, Lindorff-Larsen KG, Nielsen BU, Konge L. Determining procedures for simulation-based training in radiology: a nationwide needs assessment. *Eur Radiol* 2018;**28**:2319–2327.
22. Bessmann EL, Østergaard HT, Nielsen BU, Russell L, Paltved C, Østergaard D, Konge L, Nayahangan LJ. Consensus on technical procedures for simulation-based training in anaesthesiology: A Delphi-based general needs assessment. *Acta Anaesthesiol Scand* 2019;
23. Abu-Sultaneh S, Whitfill T, Rowan CM, Friedman ML, Pearson KJ, Berrens ZJ, Lutfi R, Auerbach MA, Abulebda K. Improving Simulated Pediatric Airway Management in Community Emergency Departments Using a Collaborative Program With a Pediatric Academic Medical Center. *Respir Care* 2019;**64**:1073–1081.
24. Miller KA, Nagler J. Advances in Emergent Airway Management in Pediatrics. *Emerg Med Clin North Am* 2019;**37**:473–491.
25. Kennedy CC, Cannon EK, Warner DO, Cook DA. Advanced airway management simulation training in medical education: a systematic review and meta-analysis. *Crit Care Med* 2014;**42**:169–178.
26. Rajani AK, Chitkara R, Oehlert J, Halamek LP. Comparison of umbilical venous and intraosseous access during simulated neonatal resuscitation. *Pediatrics* 2011;**128**:e954-958.

- 1  
2  
3  
4 27. Sawyer T, Gray M, Hendrickson M, Jacobson E, Umoren R. A Real Human Umbilical Cord  
5 Simulator Model for Emergency Umbilical Venous Catheter Placement Training. *Cureus*  
6 2018;**10**:e3544.  
7  
8 28. Maconochie IK, Bingham R, Eich C, López-Herce J, Rodríguez-Núñez A, Rajka T, Van de  
9 Voorde P, Zideman DA, Biarent D, Paediatric life support section Collaborators. European  
10 Resuscitation Council Guidelines for Resuscitation 2015: Section 6. Paediatric life support.  
11 *Resuscitation* 2015;**95**:223–248.  
12  
13 29. Soar J, Maconochie I, Wyckoff MH, Olasveengen TM, Singletary EM, Greif R, Aickin R,  
14 Bhanji F, Donnino MW, Mancini ME, Wyllie JP, Zideman D, Andersen LW, Atkins DL, Aziz K,  
15 Bendall J, Berg KM, Berry DC, Bigham BL, Bingham R, Couto TB, Böttiger BW, Borra V, Bray  
16 JE, Breckwoldt J, Brooks SC, Buick J, Callaway CW, Carlson JN, Cassan P, et al. 2019  
17 International Consensus on Cardiopulmonary Resuscitation and Emergency Cardiovascular  
18 Care Science With Treatment Recommendations: Summary From the Basic Life Support;  
19 Advanced Life Support; Pediatric Life Support; Neonatal Life Support; Education,  
20 Implementation, and Teams; and First Aid Task Forces. *Circulation*  
21 2019;CIR00000000000000734.  
22  
23 30. Mayordomo-Colunga J, González-Cortés R, Bravo MC, Martínez-Mas R, Vázquez-Martínez  
24 JL, Renter-Valdovinos L, Conlon TW, Nishisaki A, Cabañas F, Bilbao-Sustacha JÁ, Oulego-  
25 Erroz I. [Point-of-care ultrasound: Is it time to include it in the paediatric specialist training  
26 program?]. *An Pediatr Barc Spain* 2003 2019;**91**:206.e1-206.e13.  
27  
28 31. Zendejas B, Wang AT, Brydges R, Hamstra SJ, Cook DA. Cost: the missing outcome in  
29 simulation-based medical education research: a systematic review. *Surgery* 2013;**153**:160–  
30 176.  
31  
32  
33  
34  
35  
36  
37  
38  
39  
40  
41  
42  
43  
44  
45  
46  
47  
48  
49  
50  
51  
52  
53  
54  
55  
56  
57  
58  
59  
60

1  
2  
3  
4 CONTRIBUTORSHIP STATEMENT  
5

6 Signe Thim: study design, data collection, data analysis, figures, data interpretation, writing,  
7 submitting  
8

9 Leizl Joy Nayahangan: study design, data interpretation, writing

10 Charlotte Paltved: study design, data analysis, data interpretation, writing

11 Rune Dall Jensen: study design, data analysis, data interpretation, writing

12  
13  
14 Lars Konge: study design, data interpretation, writing

15  
16 Niels Thomas Hertel: study design, data analysis, data interpretation, writing

17  
18 Thomas Balslev: study design, data analysis, data interpretation, writing  
19  
20  
21  
22  
23  
24  
25  
26  
27  
28  
29  
30  
31  
32  
33  
34  
35  
36  
37  
38  
39  
40  
41  
42  
43  
44  
45  
46  
47  
48  
49  
50  
51  
52  
53  
54  
55  
56  
57  
58  
59  
60

1  
2  
3  
4  
5  
6  
7  
8  
9  
10  
11  
12  
13  
14  
15  
16  
17  
18  
19  
20  
21  
22  
23  
24  
25  
26  
27  
28  
29  
30  
31  
32  
33  
34  
35  
36  
37  
38  
39  
40  
41  
42  
43  
44  
45  
46  
47  
48  
49  
50  
51  
52  
53  
54  
55  
56  
57  
58  
59  
60

FIGURE LEGENDS

Figure 1:

The Delphi process.

Figure 2.

Correlation between the preliminary prioritization after Delphi round 2 and the final prioritization after Delphi round 3.

Confidential: For Review Only



Table 1  
Technical procedures identified in Delphi round 1.  
Ranked according to CAMES Needs Assessment Formula in Delphi round 2

|    | Procedure group                                              | No. of procedures performed (Frequency) | No. of doctors | Impact | Feasibility | TOTAL CAMES NAF score |
|----|--------------------------------------------------------------|-----------------------------------------|----------------|--------|-------------|-----------------------|
| 1  | Airway management, acute, neonatal                           | 4.36                                    | 4.63           | 4.52   | 4.33        | 4.46                  |
| 2  | Lumbar puncture                                              | 3.81                                    | 4.79           | 4.51   | 4           | 4.28                  |
| 3  | Airway management, acute, non-neonatal                       | 3.4                                     | 4.82           | 4.19   | 4.33        | 4.19                  |
| 4  | Peripheral intravenous and intraosseous access, non-neonatal | 4.79                                    | 4.91           | 4.34   | 2.67        | 4.18                  |
| 5  | Intubation                                                   | 2.57                                    | 4.07           | 4.78   | 4.33        | 3.94                  |
| 6  | Peripheral intravenous access, neonatal                      | 4.27                                    | 4.14           | 4.54   | 2.67        | 3.91                  |
| 7  | Advanced heart lung resuscitation                            | 2.16                                    | 4.88           | 4.4    | 4           | 3.86                  |
| 8  | Nasogastric tube insertion                                   | 3.66                                    | 4.31           | 4.09   | 3.33        | 3.85                  |
| 9  | Neurologic examination of the newborn                        | 4.73                                    | 4.87           | 3.79   | 2           | 3.84                  |
| 10 | Intraosseous access, neonatal                                | 2.97                                    | 4.71           | 4.82   | 2.67        | 3.79                  |
| 11 | Injections; intradermal, subcutaneous, intramuscular         | 3.39                                    | 4.19           | 4.87   | 2.67        | 3.78                  |
| 12 | Barlow and Ortolani test; congenital hip dislocation         | 4.31                                    | 4.85           | 3.84   | 1.67        | 3.70                  |
| 13 | Pneumothorax management                                      | 2.16                                    | 3.61           | 4.6    | 4.33        | 3.68                  |
| 14 | Suprapubic bladder aspiration                                | 3.49                                    | 4.49           | 4.13   | 2.33        | 3.61                  |
| 15 | Ear examination including otoscopy and tympanometry          | 4.57                                    | 4.85           | 3.91   | 2           | 3.56                  |
| 16 | Sample collection, microbiology                              | 3.61                                    | 3.96           | 3.97   | 2.67        | 3.55                  |
| 17 | Collecting vital signs                                       | 4.54                                    | 4.74           | 3.46   | 1.33        | 3.52                  |
| 18 | Neurologic examination of the child, not newborn             | 4.61                                    | 4.69           | 3.76   | 1           | 3.51                  |
| 19 | Rectal examination                                           | 4.1                                     | 4.75           | 3.08   | 2           | 3.48                  |
| 20 | Foreign bodies of the airway; airway management              | 1.76                                    | 4.52           | 4.1    | 3.33        | 3.43                  |
| 21 | Bladder catheterization                                      | 2.72                                    | 4.1            | 4.18   | 2.33        | 3.33                  |
| 22 | Amplitude integrated electroencephalography (aEEG)           | 2.79                                    | 2.91           | 3.79   | 3.33        | 3.21                  |
| 23 | Asthma related technical procedures                          | 4.24                                    | 3.69           | 3.79   | 1           | 3.18                  |
| 24 | Peripheral inserted central catheter, neonatal               | 2.42                                    | 2.45           | 4.67   | 2.67        | 3.05                  |
| 25 | Bedside Fast Assessment Diagnostic Echocardiography (FADE)   | 3.16                                    | 2.22           | 4.13   | 2.33        | 2.96                  |
| 26 | Bedside bladder ultrasound                                   | 3.81                                    | 3.48           | 3.33   | 1           | 2.91                  |
| 27 | Ventilator settings                                          | 2.43                                    | 2.12           | 4.6    | 2.33        | 2.87                  |
| 28 | Diabetes related technical procedures                        | 3.55                                    | 2.51           | 4      | 1.33        | 2.85                  |
| 29 | Bone marrow biopsy and aspiration                            | 2.1                                     | 1.72           | 4.34   | 2.67        | 2.71                  |
| 30 | Bedside neonatal cranial ultrasound                          | 3.01                                    | 2.27           | 3.84   | 1.67        | 2.70                  |
| 31 | Ophthalmoscopy                                               | 1.82                                    | 2.01           | 4      | 2.67        | 2.63                  |
| 32 | Arthrocentesis                                               | 2.21                                    | 1.49           | 4.39   | 2.33        | 2.61                  |

|    |                                                                  |      |      |      |      |      |
|----|------------------------------------------------------------------|------|------|------|------|------|
| 33 | Handling percutaneous endoscopic gastrostomy (PEG) feeding tubes | 2.66 | 2.63 | 3.84 | 1    | 2.53 |
| 34 | Bedside lung ultrasound                                          | 1.75 | 2.3  | 3.64 | 2.33 | 2.51 |
| 35 | Transabdominal ultrasound measurement of rectal diameter         | 3.01 | 2.31 | 3.45 | 1    | 2.44 |
| 36 | Bedside abdominal ultrasound                                     | 1.39 | 1.63 | 3.75 | 2.33 | 2.28 |
| 37 | Biopsy of skin, tendon and muscles                               | 1.75 | 2.75 | 3.21 | 1.33 | 2.26 |

Table 2

Final prioritized list of technical procedures in pediatrics that should be integrated in simulation-based curricula.

|    | Procedure group                                              | Description                                                                                                                                                                                                                  |
|----|--------------------------------------------------------------|------------------------------------------------------------------------------------------------------------------------------------------------------------------------------------------------------------------------------|
| 1  | Airway management, acute, neonatal                           | Securing airway including optimal positioning, face mask ventilation, use of T-piece resuscitator (e.g. Neopuff), oropharyngeal airway, nasopharyngeal airway, suction and optimal positioning. Use of mask-CPAP and DUOPAP. |
| 2  | Airway management, acute, non-neonatal                       | Securing airway including optimal positioning, face mask ventilation, use of oropharyngeal airway and suction.                                                                                                               |
| 3  | Peripheral intravenous and intraosseous access, non-neonatal | Peripheral iv-access including use of different kinds of vein finders. Use of scalp veins for access in infants. Intraosseous access including site selection in different ages.                                             |
| 4  | Vascular access, neonatal                                    | Peripheral intravenous access, umbilical vein catheterization, umbilical artery catheterization and peripherally inserted central venous catheters (PICC lines)                                                              |
| 5  | Advanced heart lung resuscitation                            | Chest compressions and face mask ventilation for adolescents, children, and neonates. Use of defibrillator - manual and automated external defibrillator (AED)                                                               |
| 6  | Lumbar puncture                                              | For adolescents, children, and neonates                                                                                                                                                                                      |
| 7  | Intraosseous access, neonatal                                | Intraosseous access in neonates including correct intraosseous needle positioning and the avoidance of dislodgement.                                                                                                         |
| 8  | Pneumothorax management                                      | Needle decompression of pneumothorax.                                                                                                                                                                                        |
| 9  | Foreign bodies of the airway; airway management              | Airway management, removing visible foreign body, use of back blows and abdominal thrusts.                                                                                                                                   |
| 10 | Neurologic examination of the child less than 1 year of age. | Neurologic examination including "the 180-degree examination".                                                                                                                                                               |
| 11 | Suprapubic bladder aspiration                                | Suprapubic aspiration to take a urine sample, with or without ultrasound guidance.                                                                                                                                           |
| 12 | Injections; intradermal, subcutaneous, intramuscular         | Different kinds of injection including the use of an epinephrine auto injector.                                                                                                                                              |
| 13 | Neurologic examination of the child above 1 year of age      | Examination of sensory function, motor function, reflexes, cranial nerves, cognition and development. Hyperventilation test for Absence seizures.                                                                            |
| 14 | Bladder catheterization                                      | Urinary Catheterization, both gender and all pediatric ages.                                                                                                                                                                 |
| 15 | Asthma related technical procedures                          | Use of inhalation devices and pulmonary function tests.                                                                                                                                                                      |
| 16 | Amplitude integrated electroencephalography (aEEG)           | Initiating amplitude integrated electroencephalography.                                                                                                                                                                      |
| 17 | Bedside bladder ultrasound                                   | Measure the volume of urine.                                                                                                                                                                                                 |
| 18 | Transabdominal ultrasound measurement of rectal diameter     | As a diagnostic tool in childhood constipation.                                                                                                                                                                              |
| 19 | Diabetes related technical procedures                        | Handling different insulin pumps and use of insuflon (angled injection port).                                                                                                                                                |

1  
2  
3  
4  
5  
6  
7  
8  
9  
10  
11  
12  
13  
14  
15  
16  
17  
18  
19  
20  
21  
22  
23  
24  
25  
26  
27  
28  
29  
30  
31  
32  
33  
34  
35  
36  
37  
38  
39  
40  
41  
42  
43  
44  
45  
46  
47  
48  
49  
50  
51  
52  
53  
54  
55  
56  
57  
58  
59  
60



190x275mm (600 x 600 DPI)

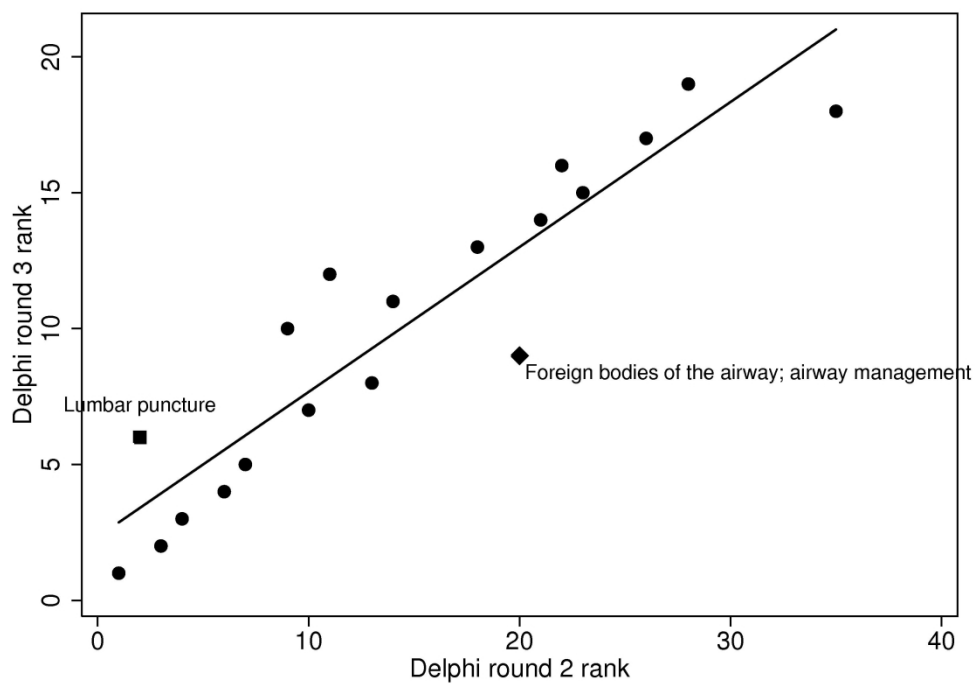

139x101mm (600 x 600 DPI)

# BMJ Paediatrics Open

## Identifying and prioritizing technical procedures for simulation-based curriculum in pediatrics: A Delphi-based general needs assessment

|                               |                                                                                                                                                                                                                                                                                                                                                                                                                                                                                                                                                                                                                                             |
|-------------------------------|---------------------------------------------------------------------------------------------------------------------------------------------------------------------------------------------------------------------------------------------------------------------------------------------------------------------------------------------------------------------------------------------------------------------------------------------------------------------------------------------------------------------------------------------------------------------------------------------------------------------------------------------|
| Journal:                      | <i>BMJ Paediatrics Open</i>                                                                                                                                                                                                                                                                                                                                                                                                                                                                                                                                                                                                                 |
| Manuscript ID                 | bmjpo-2020-000697.R2                                                                                                                                                                                                                                                                                                                                                                                                                                                                                                                                                                                                                        |
| Article Type:                 | Original research                                                                                                                                                                                                                                                                                                                                                                                                                                                                                                                                                                                                                           |
| Date Submitted by the Author: | 04-Jul-2020                                                                                                                                                                                                                                                                                                                                                                                                                                                                                                                                                                                                                                 |
| Complete List of Authors:     | Thim, Signe; Aarhus University Hospital, Department of Paediatrics and Adolescent Medicine<br>Nayahangan, Leizl Joy; University of Copenhagen, Copenhagen Academy for Medical Education and Simulation (CAMES)<br>Paltved, Charlotte; Aarhus University, Department of Clinical Medicine<br>Jensen, Rune Dall; Aarhus University, Department of Clinical Medicine<br>Konge, Lars; University of Copenhagen, Copenhagen Academy for Medical Education and Simulation (CAMES)<br>Hertel, Niels Thomas; Odense University Hospital, Department of Clinical Development<br>Balslev, Thomas; Viborg Regional Hospital, Department of Paediatrics |
| Keywords:                     | Clinical Procedures, General Paediatrics, Medical Education                                                                                                                                                                                                                                                                                                                                                                                                                                                                                                                                                                                 |
|                               |                                                                                                                                                                                                                                                                                                                                                                                                                                                                                                                                                                                                                                             |

SCHOLARONE™  
Manuscripts



I, the Submitting Author has the right to grant and does grant on behalf of all authors of the Work (as defined in the below author licence), an exclusive licence and/or a non-exclusive licence for contributions from authors who are: i) UK Crown employees; ii) where BMJ has agreed a CC-BY licence shall apply, and/or iii) in accordance with the terms applicable for US Federal Government officers or employees acting as part of their official duties; on a worldwide, perpetual, irrevocable, royalty-free basis to BMJ Publishing Group Ltd ("BMJ") its licensees and where the relevant Journal is co-owned by BMJ to the co-owners of the Journal, to publish the Work in this journal and any other BMJ products and to exploit all rights, as set out in our [licence](#).

The Submitting Author accepts and understands that any supply made under these terms is made by BMJ to the Submitting Author unless you are acting as an employee on behalf of your employer or a postgraduate student of an affiliated institution which is paying any applicable article publishing charge ("APC") for Open Access articles. Where the Submitting Author wishes to make the Work available on an Open Access basis (and intends to pay the relevant APC), the terms of reuse of such Open Access shall be governed by a Creative Commons licence – details of these licences and which [Creative Commons](#) licence will apply to this Work are set out in our licence referred to above.

Other than as permitted in any relevant BMJ Author's Self Archiving Policies, I confirm this Work has not been accepted for publication elsewhere, is not being considered for publication elsewhere and does not duplicate material already published. I confirm all authors consent to publication of this Work and authorise the granting of this licence.

## Identifying and prioritizing technical procedures for simulation-based curriculum in paediatrics: A Delphi-based general needs assessment

Signe Thim, MD<sup>1</sup>, Leizl Joy Nayahangan RN, MHCM<sup>2</sup>, Charlotte Paltved MD<sup>3,4</sup>, Rune Dall Jensen MSc, PhD<sup>3,4</sup>, Lars Konge MD, PhD<sup>2,6</sup>, Niels Thomas Hertel MD, PhD<sup>6</sup>, Thomas Balslev MD, PhD<sup>3,7</sup>

<sup>1</sup>Department of Paediatrics and Adolescent Medicine, Aarhus University Hospital, Aarhus, Denmark

<sup>2</sup>Copenhagen Academy for Medical Education and Simulation (CAMES), University of Copenhagen and The Capital Region of Denmark, Copenhagen, Denmark

<sup>3</sup>Department of Clinical Medicine, Aarhus University, Aarhus, Denmark

<sup>4</sup>MidtSim - Corporate HR, Central Region Denmark, Aarhus, Denmark

<sup>5</sup>Faculty of Health and Medical Sciences, University of Copenhagen, Copenhagen, Denmark

<sup>6</sup>Centre for Postgraduate Medical Education, Department of Clinical Development, Odense University Hospital, Odense, Denmark

<sup>7</sup>Department of Paediatrics, Regional Hospital Viborg, Viborg, Denmark

Short title: Simulation-based curriculum in paediatrics

Funding: none

Conflicts of interests: none

Data statement: individual data cannot be shared

Keywords: Simulation-based training, Needs assessment, Curriculum development, Delphi technique, Paediatric education

Corresponding author and reprints:

Signe Thim

Department of Paediatrics and Adolescent Medicine

Aarhus University Hospital

Palle Juul-Jensens Boulevard 99

DK-8200 Aarhus N

Tel No: +45 7845 0000

Email: [signe.thim@rm.dk](mailto:signe.thim@rm.dk)



## ABSTRACT

### *Objectives*

To identify and prioritize technical procedures that should be integrated in a curriculum of simulation-based procedural training in paediatrics using the Delphi method.

### *Study design*

National general needs assessment using a Delphi process was completed among 93 key opinion leaders in paediatrics in Denmark. Delphi round 1 identified technical procedures. Round 2 explored frequency of procedures, number of paediatricians performing the procedures, risks and/or discomfort for patients, and feasibility for simulation-based training. Round 3 included final elimination and reprioritization.

### *Results*

Response rates in the Delphi rounds were 73%, 71% and 72%. We identified 37 procedures in Delphi round 1, pre-prioritized in round 2, resulting in a final list of 19 procedures in round 3. Strong correlation between the prioritization from the second and third Delphi rounds was identified, Spearman's rho of 0.94 ( $p < 0.0001$ ). Top-five on the final list were acute neonatal airway management, acute non-neonatal airway management, non-neonatal peripheral intravenous and intraosseous access, neonatal vascular access, and advanced heart lung resuscitation.

### *Conclusion*

We identified and prioritized 19 technical procedures in paediatrics that are suitable for simulation and may be used as a guide for the development of simulation-based curriculum in paediatrics.

## KEY MESSAGES:

*What is known about the subject:*

Paediatricians are expected to possess the skills of managing acutely ill children in a broad specialty in high-stakes time sensitive acute situations.

Rarity of acute events limits exposure and it is impractical and unethical to rely entirely on apprenticeship and clinical interactions to develop the skills required.

Simulation-based training is often driven by opinion of local educators, available simulators or coincidence. Development of a curriculum should follow a structured and systematic process.

*What this study adds:*

A needs assessment using a Delphi process to identify and prioritize technical procedures that are suitable for simulation in paediatrics.

The procedures represent core competencies in paediatric specialist training that should be practiced in a simulation-based environment before applied on patients.

Educators may use this list to develop, plan, and implement simulation-based training curricula for paediatric trainees.

## INTRODUCTION

Paediatricians are expected to possess the skills of managing acutely ill children. However, the volume of acute events in paediatric emergency departments often limits exposure to many procedures. In addition, paediatrics is a broad specialty considering the broad range of patient age, different subspecialties, and rare clinical conditions. Consequently, it is both impractical and unethical to rely entirely on apprenticeship and clinical interactions to develop and master the skills required to manage the treatment of acutely ill children.

Current paediatric training in Denmark includes work-based, supervised and apprenticeship learning blended with elements of simulation-based training. Simulation-based training is often driven by opinion of local educators, available simulators or coincidence,<sup>1</sup> which has several limitations such as limited training time due to work-hour restrictions, patient safety considerations, and training programs that are not necessarily aligned with the current needs.<sup>1-3</sup> Simulation-based training of procedures in paediatrics has been shown to improve the acquisition of skills,<sup>4-8</sup> promote patient safety and reduce errors.<sup>2,9</sup> Nonetheless simulation-based training is a complex and resource-demanding educational intervention.<sup>10</sup>

The development of a simulation-based procedural training curriculum should follow a structured and systematic process, for example as described by Kern et al.<sup>11</sup> in a six-step approach: 1.

Problem identification and general needs assessment, 2. Targeted needs assessment, 3. Goals and objectives, 4. Educational strategies, 5. Implementation, and 6. Evaluation and feedback.

Unfortunately, the first step is often disregarded or is decided based on availability of simulators or local interests.<sup>12</sup> There is a need to bridge the gap between this unstructured way of developing a simulation-based procedural training curriculum and a needs-driven approach. The results may aid the development of simulation-based training programs as part of residency curricula in paediatrics.

1  
2  
3  
4 The objective of this study was to perform a national general needs assessment in paediatrics  
5  
6 using a Delphi process to identify and prioritize technical procedures that should be integrated in a  
7  
8 simulation-based training curriculum in paediatrics.  
9  
10  
11  
12  
13  
14  
15  
16  
17  
18  
19  
20  
21  
22  
23  
24  
25  
26  
27  
28  
29  
30  
31  
32  
33  
34  
35  
36  
37  
38  
39  
40  
41  
42  
43  
44  
45  
46  
47  
48  
49  
50  
51  
52  
53  
54  
55  
56  
57  
58  
59  
60

Confidential: For Review Only

## MATERIALS AND METHODS

### *Study design*

The study consisted of a three-round Delphi process to establish consensus and prioritize technical procedures for simulation-based training (Figure 1). The Delphi technique is widely accepted as a valid tool to obtain expert opinion, obtain consensus, and support decision making.<sup>13–15</sup> During each Delphi round, the preceding results are presented to the participants in an anonymous manner to re-evaluate and explore. The Delphi technique allows involvement of participants from across different locations. This means that they do not have to meet in person, that anonymity is maintained, which is key to the Delphi process and avoids strong characters dominating the process. In this modified Delphi, we had planned on the number of rounds a priori but were open to another round if consensus was not achieved. In most cases, consensus is reached after three rounds<sup>13</sup> and therefore we decided on three rounds. The results from previous rounds were fed to the next round for review and exploration. This method has been used to develop curricula for simulation-based training in various specialties.<sup>16–22</sup> The study was conducted from December 2017 to September 2018.

### *Participants*

The participants were key opinion leaders in paediatric education and were identified based on their roles in the specialist training and education of paediatric trainees across Denmark. The study was nation-wide and all paediatricians who are involved in residency training and education were invited. These include post-graduate clinical associate professors, heads of clinical education and training of all paediatric departments, heads of paediatric departments, conveners of mandatory courses for paediatric specialization, professors, members of educational committees, board members of The Danish Society for Paediatrics and board members of The Danish Young Paediatricians Association. Participants were invited individually and introduced to the study via e-mails. The second and third round were administered to all the participants regardless if they responded or not in first and second round. Participation was voluntary.

### *Patient and public involvement*

No patients participated and there was no public involvement in the study.

### *Data collection*

The Delphi process was conducted through online survey questionnaires using survey software (Survey Monkey, San Mateo, CA, USA) and were distributed by e-mail. Reminder emails were sent up to three times. A multidisciplinary research steering group was formed to facilitate data collection and analysis. It consisted of five members, all investigators and co-authors of the study: two paediatric consultants and postgraduate clinical associate professors (TB and TH), head of research at a simulation centre (CP), an assistant professor (RD), and a paediatric resident, who is also a member of the educational committee in paediatrics and a board member of The Danish Society for Paediatrics (ST). Anonymity of responses was maintained. The primary investigator (ST) was responsible for data organization, ensuring that the answers were blinded from the rest of the steering group. All suggestions from the participants were considered and were only eliminated when consensus was not reached

### *Delphi round 1: brainstorming phase*

The Delphi process started with a brainstorming phase, where the participants were asked to suggest all technical procedures which a paediatrician who had just completed specialist training in paediatrics should be able to perform. All suggested procedures were reviewed by the research steering group and non-technical skills were removed (e.g. team training and communication skills). The remaining technical procedures were consolidated into categories where similar procedures were grouped. This consolidated list of technical procedures was used in Delphi round 2.

### *Delphi round 2: survey*

1  
2  
3  
4 We used a previously developed needs assessment formula (NAF) from the Copenhagen  
5 Academy for Medical Education and Simulation (CAMES) to prioritize the included procedures  
6 from the first Delphi round (1, 20). This formula explores the need for simulation-based training of a  
7 given technical procedure by investigating four different factors.  
8  
9  
10  
11

- 12
- 13
- 14
- 15 1) Frequency; the number of procedures performed annually
- 16
- 17 2) Operators; number of physicians that should be able to perform the procedure
- 18
- 19 3) Impact; discomfort/risk if the procedure is performed by an inexperienced physician
- 20
- 21 4) Feasibility; suitability for learning the procedure in simulation-based environment.  
22
- 23
- 24

25 Each technical procedure/procedure group from Delphi round 1 was evaluated according to these  
26 four factors. Frequency, operators, and impact were stated as multiple-choice items on a five-point  
27 rating scale ranging from 1-5. The fourth element of the formula (feasibility for simulation-based  
28 training) was challenging for the participants to estimate and was therefore evaluated by the  
29 steering group. Feasibility was calculated as the mean score of three equally weighted factors:  
30 suitability for simulation-based training, equipment availability and associated costs. We used the  
31 means and not medians for ranking the procedures because using the medians would create many  
32 ties in the ranking. The steering group explored feasibility of each technical procedure from Delphi  
33 1 using a five-point Likert scale ranging from 1 to 5.  
34  
35  
36  
37  
38  
39  
40  
41  
42  
43  
44  
45

46 The CAMES NAF score for the individual technical procedure was the average of the mean scores  
47 (1-5) of the four factors (frequency, physicians, impact, and feasibility) giving each factor equal  
48 weighting of 25%. Alternative weighting was considered but decided against because arguing for  
49 and quantitating alternative unequal weights was difficult, i.e., is it more important to practice a  
50 high-frequency low risk procedure or a very rare high risk procedure. The resulting total CAMES  
51  
52  
53  
54  
55  
56  
57  
58  
59  
60

1  
2  
3  
4 NAF score from 1 to 5 points determined the procedures' ranking on the preliminary prioritized list  
5  
6 used in the third Delphi round.  
7  
8  
9

### 10 *Delphi round 3: elimination and prioritization*

11  
12 The preliminary prioritized list of technical procedures from Delphi round 2 was sent to the  
13  
14 participants for re-evaluation. The participants were asked to eliminate technical procedures that  
15  
16 they found unsuitable for learning in a simulation-based environment, simple technical procedures  
17  
18 that should have been learned in pregraduate medical education or very advanced technical  
19  
20 procedures that are learned in the later part of specialist training. The participants also had the  
21  
22 opportunity to reprioritize the remaining procedures.  
23  
24  
25  
26

### 27 *Data analysis and statistics*

28  
29 In Delphi round 1, we eliminated non-technical skills and grouped similar procedures into  
30  
31 categories. We grouped them together when the procedures could be combined and trained in one  
32  
33 training program. In Delphi round 2, the mean score for each factor was calculated and the  
34  
35 CAMES NAF score was used to produce a preliminary ranked list of technical procedures used in  
36  
37 Delphi round 3. In Delphi round 3, we calculated the number of occurrences for each response  
38  
39 using frequency analysis and applied a degree of agreement of  $\geq 70\%$  to establish consensus. The  
40  
41 procedures that had  $< 70\%$  support from the participants were eliminated from the final list.  
42  
43 Spearman's rho was calculated to explore the alignment between prioritization according to the  
44  
45 CAMES NAF (Delphi round 2) and the final decisions of the participants (Delphi round 3). All  
46  
47 analyses were performed using STATA/IC 15.1 (StataCorp, Texas, USA).  
48  
49  
50  
51  
52  
53  
54  
55  
56  
57  
58  
59  
60



## RESULTS

### *Results of Delphi Round 1*

A total of 93 participants were identified and invited to the study. Round 1 of the Delphi process had a response rate of 73% (68/93) and 68 clinical procedures were suggested in the brainstorming process. These were reduced to 37 procedures/procedure groups.

### *Results of Delphi Round 2*

The response rate in Delphi round 2 was 71% (66/93). A pre-prioritized list of technical procedures was generated using the CAMES NAF score. In this Delphi round, we identified acute airway management of neonates as highest priority and biopsy of skin, tendon, and muscles as least priority (Table 1).

### *Results of Delphi Round 3*

The response rate in Delphi round 3 was 72% (67/93). Eighteen technical procedures were eliminated. The final list included 19 technical procedures (Table 2).

A Spearman's rho of 0.94 ( $p < 0.0001$ ) showed a strong correlation between the prioritization order of the technical procedures from Delphi round 2 and the final list in Delphi round 3 (Figure 2).

## DISCUSSION

We performed a general needs assessment to identify and prioritize technical procedures that should be integrated in a curriculum of simulation-based procedural training in paediatrics. A prioritized list of 19 technical procedure was produced using a three-round Delphi process among key opinion leaders in education in paediatric. All paediatric departments involved in the specialist training program were represented, and the response rates were consistently high in all three rounds, indicating strong support from the participants and increasing the credibility of our results.

Airway management of both neonatal and non-neonatal topped the final list with highest priority.

Airway management comprises several hands-on procedures and some of the airway management procedures are performed infrequently, making it relevant for simulation-based procedure training. Improvement in airway management skills through simulation-based training among paediatric residents has been shown in several studies.<sup>5,23,24</sup> There is a growing body of evidence finding that a simulation-based airway management curriculum is superior to no intervention and to non-simulation intervention for education outcomes.<sup>25</sup>

Non-neonatal peripheral intravenous and intraosseous access and neonatal vascular access ranked third and fourth respectively in the final prioritized list. Neonatal intraosseous access ranked lower in the list, probably because it is rarely performed due to umbilical vein and artery availability. Nevertheless, it has been shown that intraosseous access can be performed more quickly in neonates than umbilical vein catheterization, especially for paediatricians who do not routinely place umbilical vein catheters.<sup>26</sup> A low-cost model with real umbilical cord has been described to provide a more realistic training model than currently available commercial simulators.<sup>27</sup>

Advanced heart lung resuscitation was the fifth procedure on the final prioritized list. Advanced heart lung resuscitation comprises several hands-on procedures in form of cardiopulmonary

1  
2  
3  
4 resuscitation with rescue breathing and chest compressions as well as airway management and  
5  
6 defibrillation.<sup>28</sup>  
7  
8  
9

10 The top five procedures in the final prioritized list are all part of the Airway, Breathing, Circulation,  
11 Disability, Exposure (ABCDE) approach of paediatric advanced life support and resuscitation.<sup>29</sup>  
12

13 These procedures represent core competencies in paediatric specialist training. The skills are  
14  
15 required in high-stakes time sensitive acute settings, and thereby emphasizes the need for  
16  
17 simulation-based training of these procedures.  
18  
19  
20  
21  
22

23 The strong correlation between the results from Delphi round 2 and 3 indicates minimal changes in  
24 the ranking order of the procedures (Figure 2). However, a few interesting changes were observed,  
25 e.g., the change in rank for lumbar puncture and intubation which were both in top five on the pre-  
26 prioritized list from round 2. Lumbar puncture rated second in Delphi round 2 and changed to a  
27 sixth placement in Delphi round 3, most likely because lumbar puncture is a less acute procedure  
28 compared to airway management, vascular access and advanced heart lung resuscitation which  
29 ended up in top-five. Intubation ranked fifth after the second Delphi round, but was eliminated in  
30 the final round. This is probably because the participants were asked to eliminate the very  
31 advanced technical procedures that are not expected for a newly specialized trainee to perform.  
32  
33  
34  
35  
36  
37  
38  
39  
40  
41  
42  
43

44 Ultrasonography only appeared as no. 17 and 18 in the final list in contrast to several ultrasound  
45 related procedures which were found in Delphi round 2. We assume that they were regarded as  
46 specialized procedures that only some paediatricians should master. In a recent study on general  
47 needs assessment in radiology, the top 5 procedures included ultrasonography.<sup>21</sup> In addition,  
48 ultrasonography is listed among the top-10 procedures in cardiology,<sup>16</sup> urology,<sup>19</sup> pulmonology,<sup>20</sup>  
49 and anesthesia.<sup>22</sup> The relatively low ranking of ultrasonography in our study compared to that seen  
50  
51 in other specialties may indicate that experience with ultrasonography among the paediatric  
52  
53  
54  
55  
56  
57  
58  
59  
60

1  
2  
3  
4 participants is relatively low at this point. We may expect a stronger need for training of  
5  
6 ultrasonography in paediatrics in years to come as in international proposals.<sup>30</sup>  
7  
8  
9

10 The combination of CAMES NAF score and a three-round Delphi not only identified but also  
11 prioritized the technical procedures for simulation-based training. CAMES NAF score prioritizes  
12 procedures if they are frequent, performed by many physicians, potentially harmful to patients if  
13 performed by a non-competent physician, and very feasible to train simulation-based.<sup>1</sup> The  
14 participants were free to remove and reprioritize the procedures from the second round if they did  
15 not agree with the prioritization resulting from the CAMES NAF score. However, we found a strong  
16 correlation between the ranking order after the second and third Delphi rounds, indicating that the  
17 participants widely agreed with the results based on CAMES NAF score in the second Delphi  
18 round. The same strong correlation has been found in previous needs assessment studies in other  
19 specialties.<sup>18,20</sup>  
20  
21  
22  
23  
24  
25  
26  
27  
28  
29  
30  
31  
32  
33

34 It is a strength of this study that all departments involved in the paediatric specialist training  
35 programs in Denmark were represented, indicating strong support from the departments and  
36 increasing the generalizability and credibility of the study results. Furthermore, this study used a  
37 well-known method for curriculum development<sup>12</sup> and followed international methodological criteria  
38 for reporting of Delphi studies.<sup>14</sup> Additionally, a strength of the Delphi process is that surveys are  
39 sent electronically which reduces the risk of participants influencing each other and allows  
40 participants across different geographical locations to participate.  
41  
42  
43  
44  
45  
46  
47  
48  
49  
50

51 We are aware of the limitations in this study. The disease panorama is different from country to  
52 country, influencing the needs and some of the procedures on the list may not be transferable to  
53 other countries. However, we believe that the generalizability of this study is quite high, particularly  
54 because the top five procedures, on our final prioritized list represents core procedures in acute  
55 situations and therefore may be transferable. In perspective, it would be interesting to perform the  
56  
57  
58  
59  
60

1  
2  
3  
4 need assessment in other countries and compare results. Another limitation is the three-round  
5  
6 survey design, which takes time for the participants to respond to, and therefore may have caused  
7  
8 some potential participants to decline participation. The response rate in this study varied in the  
9  
10 three rounds, with the lowest response rate in Delphi-round 2. Overall, we had high response rates  
11  
12 as seen in similar studies.<sup>16–22</sup> In relation to skills in ultrasound, we have noted above that a  
13  
14 change in experience and practice might change ranking of ultrasound skills over time. This may  
15  
16 also relate to other skills, both those included and not included in the current report, including  
17  
18 views on what is feasible in paediatric skill training may thus change over time. As such, the  
19  
20 current results may reflect what is perceived as skills needed today and not skills needed in the  
21  
22 future. Educating the future's clinicians, it is important to bear future needs in mind. Asking the  
23  
24 respondents to focus on this aspect may have shifted their responses and priorities somewhat,  
25  
26 however, the acute skills rated at the top are unlikely to change markedly over time.  
27  
28  
29  
30

31  
32 It is important to note that only technical skills for simulation-based procedural training were asked  
33  
34 for and identified in this study. Factors that impact training such as communication, leadership, and  
35  
36 other non-technical skills should be incorporated when developing more team-based simulation-  
37  
38 based programs. Finally, it is important to acknowledge that we only explored which procedures to  
39  
40 train in a simulation-based environment. Exploration of other important factors in curriculum  
41  
42 development such as volume of training and how to implement training is outside the scope of the  
43  
44 current study.  
45  
46  
47

48  
49 Implementing simulation-based training is associated with economic costs related to doctors  
50  
51 spending working hours away from patients and sometimes to training facilities and equipment.  
52  
53 The costs involved in the development and implementation of simulation-based training remains  
54  
55 incomplete<sup>31</sup>. However, the gains related to better training in human and economic terms should  
56  
57 also be considered. The cost-effectiveness of simulation-based training in paediatrics according to  
58  
59 the procedures identified in this study remains to be studied.  
60

1  
2  
3  
4  
5  
6 In conclusion, this needs assessment identified and prioritized a list of clinically relevant technical  
7  
8 procedures suitable for simulation-based training in paediatrics. The procedures represent core  
9  
10 competencies in paediatric specialist training that should be practiced in a simulation-based  
11  
12 environment before applied on patients. Educators may use this list to develop, plan, and  
13  
14 implement simulation-based training curricula for paediatric trainees.  
15  
16  
17  
18  
19  
20  
21  
22  
23  
24  
25  
26  
27  
28  
29  
30  
31  
32  
33  
34  
35  
36  
37  
38  
39  
40  
41  
42  
43  
44  
45  
46  
47  
48  
49  
50  
51  
52  
53  
54  
55  
56  
57  
58  
59  
60

## REFERENCES

1. Nayahangan LJ, Stefanidis D, Kern DE, Konge L. How to identify and prioritize procedures suitable for simulation-based training: Experiences from general needs assessments using a modified Delphi method and a needs assessment formula. *Med Teach* 2018;**40**:676–683.
2. Clerihew L, Rowney D, Ker J. Simulation in paediatric training. *Arch Dis Child Educ Pract Ed* 2016;**101**:8–14.
3. Mills DM, Williams DC, Dobson JV. Simulation training as a mechanism for procedural and resuscitation education for pediatric residents: a systematic review. *Hosp Pediatr* 2013;**3**:167–176.
4. Gaies MG, Morris SA, Hafler JP, Graham DA, Capraro AJ, Zhou J, Landrigan CP, Sandora TJ. Reforming procedural skills training for pediatric residents: a randomized, interventional trial. *Pediatrics* 2009;**124**:610–619.
5. Sudikoff SN, Overly FL, Shapiro MJ. High-fidelity medical simulation as a technique to improve pediatric residents' emergency airway management and teamwork: a pilot study. *Pediatr Emerg Care* 2009;**25**:651–656.
6. Bank I, Cheng A, McLeod P, Bhanji F. Determining content for a simulation-based curriculum in pediatric emergency medicine: results from a national Delphi process. *CJEM* 2015;**17**:662–669.
7. Cheng A, Lang TR, Starr SR, Pusic M, Cook DA. Technology-enhanced simulation and pediatric education: a meta-analysis. *Pediatrics* 2014;**133**:e1313-1323.
8. Halamek LP, Kaegi DM, Gaba DM, Sowb YA, Smith BC, Smith BE, Howard SK. Time for a new paradigm in pediatric medical education: teaching neonatal resuscitation in a simulated delivery room environment. *Pediatrics* 2000;**106**:E45.
9. McGaghie WC, Issenberg SB, Cohen ER, Barsuk JH, Wayne DB. Does simulation-based medical education with deliberate practice yield better results than traditional clinical education? A meta-analytic comparative review of the evidence. *Acad Med J Assoc Am Med Coll* 2011;**86**:706–711.
10. Cook DA, Hatala R, Brydges R, Zendejas B, Szostek JH, Wang AT, Erwin PJ, Hamstra SJ. Technology-enhanced simulation for health professions education: a systematic review and meta-analysis. *JAMA* 2011;**306**:978–988.
11. Kern DE. Curriculum development for medical education : a six-step approach. Baltimore, MD: Johns Hopkins University Press; 1998.
12. Khamis NN, Satava RM, Alnassar SA, Kern DE. A stepwise model for simulation-based curriculum development for clinical skills, a modification of the six-step approach. *Surg Endosc* 2016;**30**:279–287.
13. Hsu C, Sandford B. The Delphi Technique: making sense of consensus. *Pract Assess Res Eval* 2007:1–8.

14. Diamond IR, Grant RC, Feldman BM, Pencharz PB, Ling SC, Moore AM, Wales PW. Defining consensus: a systematic review recommends methodologic criteria for reporting of Delphi studies. *J Clin Epidemiol* 2014;**67**:401–409.
15. Dalkey NC. The Delphi Method: An Experimental Study of Group Opinion. 1969. [https://www.rand.org/pubs/research\\_memoranda/RM5888.html](https://www.rand.org/pubs/research_memoranda/RM5888.html) (13 January 2020)
16. Gustavsen PH, Nielsen DG, Paltved C, Konge L, Nayahangan LJ. A national needs assessment study to determine procedures for simulation-based training in cardiology in Denmark. *Scand Cardiovasc J SCJ* 2019;1–23.
17. Thomsen ASS, Cour M Ia, Paltved C, Lindorff-Larsen KG, Nielsen BU, Konge L, Nayahangan LJ. Consensus on procedures to include in a simulation-based curriculum in ophthalmology: a national Delphi study. *Acta Ophthalmol (Copenh)* 2018;**96**:519–527.
18. Nayahangan LJ, Konge L, Schroeder TV, Paltved C, Lindorff-Larsen KG, Nielsen BU, Eiberg JP. A National Needs Assessment to Identify Technical Procedures in Vascular Surgery for Simulation Based Training. *Eur J Vasc Endovasc Surg Off J Eur Soc Vasc Surg* 2017;**53**:591–599.
19. Nayahangan LJ, Bølling Hansen R, Gilboe Lindorff-Larsen K, Paltved C, Nielsen BU, Konge L. Identifying content for simulation-based curricula in urology: a national needs assessment. *Scand J Urol* 2017;1–7.
20. Nayahangan LJ, Clementsen PF, Paltved C, Lindorff-Larsen KG, Nielsen BU, Konge L. Identifying Technical Procedures in Pulmonary Medicine That Should Be Integrated in a Simulation-Based Curriculum: A National General Needs Assessment. *Respir Int Rev Thorac Dis* 2016;**91**:517–522.
21. Nayahangan LJ, Nielsen KR, Albrecht-Beste E, Bachmann Nielsen M, Paltved C, Lindorff-Larsen KG, Nielsen BU, Konge L. Determining procedures for simulation-based training in radiology: a nationwide needs assessment. *Eur Radiol* 2018;**28**:2319–2327.
22. Bessmann EL, Østergaard HT, Nielsen BU, Russell L, Paltved C, Østergaard D, Konge L, Nayahangan LJ. Consensus on technical procedures for simulation-based training in anaesthesiology: A Delphi-based general needs assessment. *Acta Anaesthesiol Scand* 2019;
23. Abu-Sultaneh S, Whitfill T, Rowan CM, Friedman ML, Pearson KJ, Berrens ZJ, Lutfi R, Auerbach MA, Abulebda K. Improving Simulated Pediatric Airway Management in Community Emergency Departments Using a Collaborative Program With a Pediatric Academic Medical Center. *Respir Care* 2019;**64**:1073–1081.
24. Miller KA, Nagler J. Advances in Emergent Airway Management in Pediatrics. *Emerg Med Clin North Am* 2019;**37**:473–491.
25. Kennedy CC, Cannon EK, Warner DO, Cook DA. Advanced airway management simulation training in medical education: a systematic review and meta-analysis. *Crit Care Med* 2014;**42**:169–178.
26. Rajani AK, Chitkara R, Oehlert J, Halamek LP. Comparison of umbilical venous and intraosseous access during simulated neonatal resuscitation. *Pediatrics* 2011;**128**:e954-958.



- 1  
2  
3  
4 27. Sawyer T, Gray M, Hendrickson M, Jacobson E, Umoren R. A Real Human Umbilical Cord  
5 Simulator Model for Emergency Umbilical Venous Catheter Placement Training. *Cureus*  
6 2018;**10**:e3544.  
7
- 8 28. Maconochie IK, Bingham R, Eich C, López-Herce J, Rodríguez-Núñez A, Rajka T, Van de  
9 Voorde P, Zideman DA, Biarent D, Paediatric life support section Collaborators. European  
10 Resuscitation Council Guidelines for Resuscitation 2015: Section 6. Paediatric life support.  
11 *Resuscitation* 2015;**95**:223–248.  
12
- 13 29. Soar J, Maconochie I, Wyckoff MH, Olasveengen TM, Singletary EM, Greif R, Aickin R,  
14 Bhanji F, Donnino MW, Mancini ME, Wyllie JP, Zideman D, Andersen LW, Atkins DL, Aziz K,  
15 Bendall J, Berg KM, Berry DC, Bigham BL, Bingham R, Couto TB, Böttiger BW, Borra V, Bray  
16 JE, Breckwoldt J, Brooks SC, Buick J, Callaway CW, Carlson JN, Cassan P, et al. 2019  
17 International Consensus on Cardiopulmonary Resuscitation and Emergency Cardiovascular  
18 Care Science With Treatment Recommendations: Summary From the Basic Life Support;  
19 Advanced Life Support; Pediatric Life Support; Neonatal Life Support; Education,  
20 Implementation, and Teams; and First Aid Task Forces. *Circulation*  
21 2019;CIR00000000000000734.  
22
- 23 30. Mayordomo-Colunga J, González-Cortés R, Bravo MC, Martínez-Mas R, Vázquez-Martínez  
24 JL, Renter-Valdovinos L, Conlon TW, Nishisaki A, Cabañas F, Bilbao-Sustacha JÁ, Oulego-  
25 Erroz I. [Point-of-care ultrasound: Is it time to include it in the paediatric specialist training  
26 program?]. *An Pediatr Barc Spain* 2003 2019;**91**:206.e1-206.e13.  
27
- 28 31. Zendejas B, Wang AT, Brydges R, Hamstra SJ, Cook DA. Cost: the missing outcome in  
29 simulation-based medical education research: a systematic review. *Surgery* 2013;**153**:160–  
30 176.  
31  
32  
33  
34  
35  
36  
37  
38  
39  
40  
41  
42  
43  
44  
45  
46  
47  
48  
49  
50  
51  
52  
53  
54  
55  
56  
57  
58  
59  
60

1  
2  
3  
4 CONTRIBUTORSHIP STATEMENT  
5

6 Signe Thim: study design, data collection, data analysis, figures, data interpretation, writing,  
7 submitting  
8

9 Leizl Joy Nayahangan: study design, data interpretation, writing

10 Charlotte Paltved: study design, data analysis, data interpretation, writing

11 Rune Dall Jensen: study design, data analysis, data interpretation, writing

12  
13  
14 Lars Konge: study design, data interpretation, writing

15  
16 Niels Thomas Hertel: study design, data analysis, data interpretation, writing

17  
18 Thomas Balslev: study design, data analysis, data interpretation, writing  
19  
20  
21  
22  
23  
24  
25  
26  
27  
28  
29  
30  
31  
32  
33  
34  
35  
36  
37  
38  
39  
40  
41  
42  
43  
44  
45  
46  
47  
48  
49  
50  
51  
52  
53  
54  
55  
56  
57  
58  
59  
60

1  
2  
3  
4  
5  
6  
7  
8  
9  
10  
11  
12  
13  
14  
15  
16  
17  
18  
19  
20  
21  
22  
23  
24  
25  
26  
27  
28  
29  
30  
31  
32  
33  
34  
35  
36  
37  
38  
39  
40  
41  
42  
43  
44  
45  
46  
47  
48  
49  
50  
51  
52  
53  
54  
55  
56  
57  
58  
59  
60

FIGURE LEGENDS

Figure 1:

The Delphi process.

Figure 2.

Correlation between the preliminary prioritization after Delphi round 2 and the final prioritization after Delphi round 3.

Confidential: For Review Only

Table 1  
Technical procedures identified in Delphi round 1.  
Ranked according to CAMES Needs Assessment Formula in Delphi round 2

|    | Procedure group                                              | No. of procedures performed (Frequency) | No. of doctors | Impact | Feasibility | TOTAL CAMES NAF score |
|----|--------------------------------------------------------------|-----------------------------------------|----------------|--------|-------------|-----------------------|
| 1  | Airway management, acute, neonatal                           | 4.36                                    | 4.63           | 4.52   | 4.33        | 4.46                  |
| 2  | Lumbar puncture                                              | 3.81                                    | 4.79           | 4.51   | 4           | 4.28                  |
| 3  | Airway management, acute, non-neonatal                       | 3.4                                     | 4.82           | 4.19   | 4.33        | 4.19                  |
| 4  | Peripheral intravenous and intraosseous access, non-neonatal | 4.79                                    | 4.91           | 4.34   | 2.67        | 4.18                  |
| 5  | Intubation                                                   | 2.57                                    | 4.07           | 4.78   | 4.33        | 3.94                  |
| 6  | Peripheral intravenous access, neonatal                      | 4.27                                    | 4.14           | 4.54   | 2.67        | 3.91                  |
| 7  | Advanced heart lung resuscitation                            | 2.16                                    | 4.88           | 4.4    | 4           | 3.86                  |
| 8  | Nasogastric tube insertion                                   | 3.66                                    | 4.31           | 4.09   | 3.33        | 3.85                  |
| 9  | Neurologic examination of the newborn                        | 4.73                                    | 4.87           | 3.79   | 2           | 3.84                  |
| 10 | Intraosseous access, neonatal                                | 2.97                                    | 4.71           | 4.82   | 2.67        | 3.79                  |
| 11 | Injections; intradermal, subcutaneous, intramuscular         | 3.39                                    | 4.19           | 4.87   | 2.67        | 3.78                  |
| 12 | Barlow and Ortolani test; congenital hip dislocation         | 4.31                                    | 4.85           | 3.84   | 1.67        | 3.70                  |
| 13 | Pneumothorax management                                      | 2.16                                    | 3.61           | 4.6    | 4.33        | 3.68                  |
| 14 | Suprapubic bladder aspiration                                | 3.49                                    | 4.49           | 4.13   | 2.33        | 3.61                  |
| 15 | Ear examination including otoscopy and tympanometry          | 4.57                                    | 4.85           | 3.91   | 2           | 3.56                  |
| 16 | Sample collection, microbiology                              | 3.61                                    | 3.96           | 3.97   | 2.67        | 3.55                  |
| 17 | Collecting vital signs                                       | 4.54                                    | 4.74           | 3.46   | 1.33        | 3.52                  |
| 18 | Neurologic examination of the child, not newborn             | 4.61                                    | 4.69           | 3.76   | 1           | 3.51                  |
| 19 | Rectal examination                                           | 4.1                                     | 4.75           | 3.08   | 2           | 3.48                  |
| 20 | Foreign bodies of the airway; airway management              | 1.76                                    | 4.52           | 4.1    | 3.33        | 3.43                  |
| 21 | Bladder catheterization                                      | 2.72                                    | 4.1            | 4.18   | 2.33        | 3.33                  |
| 22 | Amplitude integrated electroencephalography (aEEG)           | 2.79                                    | 2.91           | 3.79   | 3.33        | 3.21                  |
| 23 | Asthma related technical procedures                          | 4.24                                    | 3.69           | 3.79   | 1           | 3.18                  |
| 24 | Peripheral inserted central catheter, neonatal               | 2.42                                    | 2.45           | 4.67   | 2.67        | 3.05                  |
| 25 | Bedside Fast Assessment Diagnostic Echocardiography (FADE)   | 3.16                                    | 2.22           | 4.13   | 2.33        | 2.96                  |
| 26 | Bedside bladder ultrasound                                   | 3.81                                    | 3.48           | 3.33   | 1           | 2.91                  |
| 27 | Ventilator settings                                          | 2.43                                    | 2.12           | 4.6    | 2.33        | 2.87                  |
| 28 | Diabetes related technical procedures                        | 3.55                                    | 2.51           | 4      | 1.33        | 2.85                  |
| 29 | Bone marrow biopsy and aspiration                            | 2.1                                     | 1.72           | 4.34   | 2.67        | 2.71                  |
| 30 | Bedside neonatal cranial ultrasound                          | 3.01                                    | 2.27           | 3.84   | 1.67        | 2.70                  |
| 31 | Ophthalmoscopy                                               | 1.82                                    | 2.01           | 4      | 2.67        | 2.63                  |
| 32 | Arthrocentesis                                               | 2.21                                    | 1.49           | 4.39   | 2.33        | 2.61                  |

|    |                                                                  |      |      |      |      |      |
|----|------------------------------------------------------------------|------|------|------|------|------|
| 33 | Handling percutaneous endoscopic gastrostomy (PEG) feeding tubes | 2.66 | 2.63 | 3.84 | 1    | 2.53 |
| 34 | Bedside lung ultrasound                                          | 1.75 | 2.3  | 3.64 | 2.33 | 2.51 |
| 35 | Transabdominal ultrasound measurement of rectal diameter         | 3.01 | 2.31 | 3.45 | 1    | 2.44 |
| 36 | Bedside abdominal ultrasound                                     | 1.39 | 1.63 | 3.75 | 2.33 | 2.28 |
| 37 | Biopsy of skin, tendon and muscles                               | 1.75 | 2.75 | 3.21 | 1.33 | 2.26 |

Table 2

Final prioritized list of technical procedures in pediatrics that should be integrated in simulation-based curricula.

|    | Procedure group                                              | Description                                                                                                                                                                                                                  |
|----|--------------------------------------------------------------|------------------------------------------------------------------------------------------------------------------------------------------------------------------------------------------------------------------------------|
| 1  | Airway management, acute, neonatal                           | Securing airway including optimal positioning, face mask ventilation, use of T-piece resuscitator (e.g. Neopuff), oropharyngeal airway, nasopharyngeal airway, suction and optimal positioning. Use of mask-CPAP and DUOPAP. |
| 2  | Airway management, acute, non-neonatal                       | Securing airway including optimal positioning, face mask ventilation, use of oropharyngeal airway and suction.                                                                                                               |
| 3  | Peripheral intravenous and intraosseous access, non-neonatal | Peripheral iv-access including use of different kinds of vein finders. Use of scalp veins for access in infants. Intraosseous access including site selection in different ages.                                             |
| 4  | Vascular access, neonatal                                    | Peripheral intravenous access, umbilical vein catheterization, umbilical artery catheterization and peripherally inserted central venous catheters (PICC lines)                                                              |
| 5  | Advanced heart lung resuscitation                            | Chest compressions and face mask ventilation for adolescents, children, and neonates. Use of defibrillator - manual and automated external defibrillator (AED)                                                               |
| 6  | Lumbar puncture                                              | For adolescents, children, and neonates                                                                                                                                                                                      |
| 7  | Intraosseous access, neonatal                                | Intraosseous access in neonates including correct intraosseous needle positioning and the avoidance of dislodgement.                                                                                                         |
| 8  | Pneumothorax management                                      | Needle decompression of pneumothorax.                                                                                                                                                                                        |
| 9  | Foreign bodies of the airway; airway management              | Airway management, removing visible foreign body, use of back blows and abdominal thrusts.                                                                                                                                   |
| 10 | Neurologic examination of the child less than 1 year of age. | Neurologic examination including "the 180-degree examination".                                                                                                                                                               |
| 11 | Suprapubic bladder aspiration                                | Suprapubic aspiration to take a urine sample, with or without ultrasound guidance.                                                                                                                                           |
| 12 | Injections; intradermal, subcutaneous, intramuscular         | Different kinds of injection including the use of an epinephrine auto injector.                                                                                                                                              |
| 13 | Neurologic examination of the child above 1 year of age      | Examination of sensory function, motor function, reflexes, cranial nerves, cognition and development. Hyperventilation test for Absence seizures.                                                                            |
| 14 | Bladder catheterization                                      | Urinary Catheterization, both gender and all pediatric ages.                                                                                                                                                                 |
| 15 | Asthma related technical procedures                          | Use of inhalation devices and pulmonary function tests.                                                                                                                                                                      |
| 16 | Amplitude integrated electroencephalography (aEEG)           | Initiating amplitude integrated electroencephalography.                                                                                                                                                                      |
| 17 | Bedside bladder ultrasound                                   | Measure the volume of urine.                                                                                                                                                                                                 |
| 18 | Transabdominal ultrasound measurement of rectal diameter     | As a diagnostic tool in childhood constipation.                                                                                                                                                                              |
| 19 | Diabetes related technical procedures                        | Handling different insulin pumps and use of insuflon (angled injection port).                                                                                                                                                |

1  
2  
3  
4  
5  
6  
7  
8  
9  
10  
11  
12  
13  
14  
15  
16  
17  
18  
19  
20  
21  
22  
23  
24  
25  
26  
27  
28  
29  
30  
31  
32  
33  
34  
35  
36  
37  
38  
39  
40  
41  
42  
43  
44  
45  
46  
47  
48  
49  
50  
51  
52  
53  
54  
55  
56  
57  
58  
59  
60



190x275mm (600 x 600 DPI)



139x101mm (600 x 600 DPI)
